# Supplementary material for: HOXC4 promotes proliferation of pancreatic cancer cells by increasing LDHA-mediated glycolysis
Source: publisher site journal article supplement (doi:10.18632/aging.206008), 2024-07-09
Supplement: Supplementary file [file aging-v16i13-206008-supplementary-material-SD1.pdf]

## SUPPLEMENTARY TABLES

Supplementary Table 1. Member of HOX family was used for analysis.

---

| HOX family number |
|-------------------|
| HOXA1             |
| HOXA10            |
| HOXA11            |
| HOXA13            |
| HOXA2             |
| HOXA3             |
| HOXA4             |
| HOXA5             |
| HOXA6             |
| HOXA7             |
| HOXA9             |
| HOXB1             |
| HOXB13            |
| HOXB2             |
| HOXB3             |
| HOXB4             |
| HOXB5             |
| HOXB6             |
| HOXB7             |
| HOXB8             |
| HOXB9             |
| HOXC10            |
| HOXC11            |
| HOXC12            |
| HOXC13            |
| HOXC4             |
| HOXC5             |
| HOXC6             |
| HOXC8             |
| HOXC9             |
| HOXD1             |
| HOXD10            |
| HOXD11            |
| HOXD12            |
| HOXD13            |
| HOXD3             |
| HOXD4             |
| HOXD8             |
| HOXD9             |

---

**Supplementary Table 3. Terms of top 200 up-regulated genes in HOXC4 high PC tissues enriched in various biological signaling.**

| <b>Terms</b>                        | <b>Gene ratio</b> | <b>P-value</b> | <b>Gene</b>            |
|-------------------------------------|-------------------|----------------|------------------------|
| GLYCOLYSIS                          | 4/16              | 2.92707E-06    | PKM/HK2/PFKP/LDHA      |
| GLUCOSE_METABOLISM                  | 4/16              | 7.81135E-06    | PKM/HK2/PFKP/LDHA      |
| FORMATION_OF_THE_CORNIFIED_ENVELOPE | 4/16              | 2.97923E-05    | SPRR1A/KRT3/KLK8/SPRR3 |
| KERATINIZATION                      | 4/16              | 0.000225009    | SPRR1A/KRT3/KLK8/SPRR3 |
| RHO_GTPASES_ACTIVATE_PKNS           | 3/16              | 0.00031488     | KLK2/H2AC14/KLK3       |
