# Supplementary material for: HOXC4 promotes proliferation of pancreatic cancer cells by increasing LDHA-mediated glycolysis
Source: Aging (Albany NY). 2024 Jul 9;16(13):11103–16. doi: 10.18632/aging.206008 (PMC11272123; doi:10.18632/aging.206008)
Supplement: Supplementary Table 2 [file aging-16-206008-s002.xlsx]

## Sheet: Sheet1
Supplementary Table 2. Differentially expressed genes between HOXC4 high and low PC tissues.
Tag	logFC	P.Value	adj.P.Val	B
MIR196A1	5.60312	4.26e-08	0.000165587	8.20256
MIR6784	4.74951	1.39e-07	0.000334933	7.11581
PRAC2	4.70418	1.32e-09	1.03e-05	11.3871
AP000697.1	4.43103	5.71e-07	0.000672158	5.82789
HOTAIR	4.2322	8.6e-09	4.26e-05	9.66859
AC090164.2	4.17933	4.52e-07	0.000615037	6.04204
HOXB-AS4	4.17851	1.4e-07	0.000334933	7.11453
LINC02156	4.08996	8.68e-08	0.000262751	7.54959
AC091179.2	4.0658	3.81e-06	0.00177229	4.10031
AK3P2	4.01552	6.43e-07	0.000672158	5.7204
AL606490.8	4.01099	2.49e-06	0.00142898	4.48779
MIR6829	3.99764	8.09e-05	0.00958066	1.33778
AC004080.2	3.89499	1.22e-05	0.00329292	3.04768
HOXC11	3.84471	2.56e-07	0.000423298	6.55903
HOXC-AS3	3.83471	1.69e-07	0.000367539	6.94196
RPL34P22	3.83009	4.1e-06	0.00183419	4.03197
MIR6867	3.71111	0.000298761	0.0190549	0.170199
AC010998.3	3.64407	4.89e-05	0.00714228	1.79138
AC008147.1	3.57408	1.16e-05	0.00322119	3.08789
LINC02086	3.55961	5.76e-10	5.23e-06	12.152
LINC02122	3.54856	0.000160579	0.0136477	0.724088
AC103702.2	3.5072	5.31e-08	0.000180722	8.00012
LDHA	3.49606	2.91e-06	0.00154072	4.3434
C5orf66-AS1	3.43969	1.41e-05	0.00361612	2.91412
SULT1C2P2	3.38232	0.000274813	0.0180998	0.244597
ST6GAL2-IT1	3.37665	4.14e-05	0.00654291	1.94028
HOXC-AS1	3.34325	2.08e-09	1.42e-05	10.9699
AC012531.1	3.30218	3.43e-07	0.00051842	6.29432
AC006483.2	3.30001	5.29e-05	0.00751527	1.72037
AC087857.1	3.28719	0.00034261	0.0205747	0.0483571
AL132838.2	3.28584	4.82e-05	0.00711836	1.80332
HOXC10	3.28025	1.2e-07	0.000327698	7.25103
MIR378A	3.25224	0.000562859	0.0266948	-0.39218
MIR6804	3.23326	0.00103505	0.0362501	-0.930039
MIR4685	3.22028	0.000938904	0.0348604	-0.844183
AL121790.2	3.20057	4.49e-05	0.0068313	1.86707
AC107464.2	3.19039	3.78e-05	0.00633933	2.02205
HOXC-AS2	3.17423	1.12e-10	1.52e-06	13.6618
TPRG1-AS2	3.14174	7.82e-05	0.00940475	1.36856
AL162713.1	3.1377	0.000167077	0.0139275	0.688628
AP001486.3	3.11614	0.000461199	0.0241776	-0.215633
AC004080.15	3.11503	0.00118561	0.0387388	-1.04949
PKM	3.10438	3.12e-07	0.000499968	6.37965
EPYC	3.09715	2.37e-05	0.00483887	2.44298
ATOH1	3.08713	0.000662609	0.028712	-0.536548
LGALS7	3.07641	0.00140027	0.0421127	-1.1956
RNU4-53P	3.0509	0.000759376	0.030996	-0.656993
AC020906.1	3.04729	0.000377518	0.0217577	-0.037887
MIR4755	3.04479	0.000531758	0.0259998	-0.341835
FEZF1-AS1	3.03855	1.15e-06	0.00088598	5.18601
SPRR1A	3.03635	0.000357018	0.0210683	0.0117326
AC234782.3	3.03355	0.000167142	0.0139275	0.688277
AF124730.1	3.02793	0.000121584	0.0117334	0.973005
AC092569.1	3.02474	5.38e-05	0.00759906	1.70442
HOTTIP	3.01688	3.48e-05	0.00621546	2.09696
MIR567	2.99663	0.00224621	0.0534148	-1.60894
AL596247.1	2.99657	4.52e-05	0.0068313	1.8626
EVX1-AS	2.99129	0.000300265	0.0191284	0.165729
AC083906.3	2.9896	8.01e-05	0.00954876	1.34709
MSLNL	2.97618	6.41e-07	0.000672158	5.72282
HOXA10-AS	2.96805	6.65e-05	0.00858944	1.51368
AC105009.1	2.96331	9.42e-05	0.0103358	1.20134
AC008649.2	2.96152	0.00057974	0.0269865	-0.418344
FEZF1	2.9576	2.43e-05	0.00491452	2.42104
AC012354.8	2.95384	0.00260394	0.0572259	-1.73765
AL049692.1	2.94694	0.00144063	0.0428553	-1.22053
SLAMF6P1	2.94377	0.00036813	0.0213767	-0.0155095
AC090753.1	2.93899	0.000977159	0.0355968	-0.879364
SLURP1	2.91624	0.00102451	0.0362225	-0.921035
RNA5SP535	2.9025	0.00093004	0.0346812	-0.835825
SNRPFP1	2.89933	0.000567376	0.0267566	-0.399259
NOP56P1	2.89874	0.00328044	0.0646218	-1.93826
MIR6859-4	2.88754	0.0053415	0.0848471	-2.35925
AC015983.1	2.88735	0.000526999	0.02586	-0.33387
AL451139.1	2.88433	0.000197347	0.015161	0.539884
AL031258.1	2.87552	0.00145171	0.0430673	-1.22724
FAHD2P1	2.87493	6.9e-06	0.00252371	3.55998
AL137073.1	2.87489	3.51e-05	0.00621546	2.08938
HOXA13	2.87138	4.92e-05	0.00714228	1.78579
AC087893.3	2.87131	0.000139451	0.0127657	0.850267
KRT3	2.87021	4.81e-06	0.00201209	3.88867
AL161626.1	2.86079	0.00351222	0.067064	-1.99742
SMIM35	2.85882	2.67e-05	0.0051714	2.33692
KLK8	2.85791	2.12e-05	0.00442036	2.5452
ARHGEF2-AS1	2.84125	0.000151979	0.0132853	0.773306
MIR1245A	2.82653	0.00291564	0.0607274	-1.83595
KLK2	2.82209	1.37e-05	0.00355741	2.93812
AC012531.6	2.81352	0.000303796	0.0192107	0.155321
ZNHIT1P1	2.80738	5.06e-05	0.00731448	1.75956
HMGB1P23	2.80527	0.000101984	0.0105931	1.13051
RNY1P9	2.80428	0.00312168	0.0628947	-1.89523
RNU6-883P	2.79277	0.00369346	0.0691325	-2.04098
AC090954.1	2.78386	0.000496453	0.0250842	-0.280952
AC073592.9	2.78267	0.000443197	0.0238983	-0.180308
SPRR3	2.77128	0.000268386	0.0178491	0.265677
AC012462.3	2.7653	0.00243649	0.0556735	-1.67979
AC027801.2	2.75686	7.7e-05	0.00933742	1.38297
RNA5SP139	2.75119	0.00325267	0.0643314	-1.93088
AC008147.3	2.73433	0.000467817	0.024286	-0.22827
AC009961.2	2.72938	0.00136422	0.0415618	-1.17273
LINC02263	2.72652	0.000878251	0.0336403	-0.785321
AL645859.1	2.7253	0.000917035	0.0344714	-0.823415
MIR210	2.72457	0.00524967	0.084075	-2.34434
MIR3136	2.71746	0.00280523	0.0594941	-1.80241
TPT1P10	2.70546	0.000464664	0.0242426	-0.222272
RPL36P16	2.7035	0.00193257	0.0496259	-1.47767
SNORA70G	2.70212	0.000888267	0.0338553	-0.79532
AP003478.1	2.69978	0.000585836	0.0270418	-0.427604
AC007378.1	2.69959	0.000825231	0.0325234	-0.730399
LINC01429	2.68299	3.69e-05	0.00631574	2.04426
RNU6-88P	2.68029	0.00532086	0.0846675	-2.35592
AC234772.2	2.67788	0.000174986	0.014311	0.647295
AC004828.1	2.67558	0.000571017	0.0268325	-0.404921
AC068594.1	2.67528	0.000921558	0.034546	-0.827751
ECEL1P1	2.67207	3.83e-05	0.00638819	2.01163
AC012627.1	2.66696	0.00645716	0.0939644	-2.52204
AP000696.1	2.66573	0.000165215	0.0138801	0.698645
AL139351.1	2.66435	0.000532516	0.0260135	-0.343096
HK2	2.65077	0.00643404	0.0938727	-2.51897
AC026464.5	2.64804	0.000383374	0.0218656	-0.0515624
AL445193.2	2.64604	0.00100442	0.0359216	-0.903594
AC013457.1	2.63828	0.00125518	0.0398178	-1.09959
NMUR2	2.63086	5.61e-05	0.00772543	1.66642
AC005550.2	2.63068	9.35e-06	0.00293592	3.28525
OSTCP8	2.63038	0.000844797	0.032938	-0.751072
LCN1P1	2.62604	7.96e-05	0.00954547	1.35324
H3P1	2.62539	0.00148542	0.0435458	-1.24737
AC015818.2	2.62293	0.000412915	0.02281	-0.117491
MIR1268A	2.62179	0.00312055	0.0628947	-1.89492
AC104964.2	2.62132	0.00036908	0.021409	-0.0177997
AL450344.3	2.61987	0.000245451	0.0170309	0.345282
AC007728.3	2.61244	0.000187277	0.0146682	0.586652
AC089999.1	2.61242	0.00210158	0.0516457	-1.55088
AL031281.1	2.61135	0.000914664	0.0344604	-0.821134
H2AC14	2.60263	0.0019837	0.0502083	-1.50048
CHN2-AS1	2.60234	0.000793731	0.0316725	-0.696056
AL139420.1	2.59534	0.00161975	0.0456648	-1.32322
RPSAP16	2.59412	0.000200336	0.0152521	0.526464
NHS-AS1	2.59015	0.00183107	0.0484517	-1.43052
XXYLT1-AS1	2.58699	0.00141988	0.042377	-1.2078
RNU6-1280P	2.58549	0.00412086	0.07364	-2.13565
GPC5-IT1	2.58339	0.00371705	0.0693595	-2.04649
UGT1A13P	2.57795	0.000675607	0.0291593	-0.553723
SLC6A21P	2.57674	0.00226294	0.0535206	-1.61541
LINC00626	2.57113	0.000661869	0.0287028	-0.535561
AL096677.1	2.56581	0.000426354	0.0233159	-0.145924
AC090125.1	2.5633	0.0032822	0.064633	-1.93872
RNU1-124P	2.56209	0.00349268	0.0668811	-1.99259
PFKP	2.56007	0.00121453	0.0391903	-1.07067
HOXA11	2.551	2.5e-05	0.00496023	2.39725
LY6D	2.55088	6.59e-05	0.00854028	1.52311
PTMAP1	2.5508	0.00043146	0.0235008	-0.15649
AC104984.6	2.54962	0.00178977	0.0480224	-1.41057
ALDOC	2.54942	0.00145428	0.0430967	-1.2288
KRT19P2	2.54801	0.00027598	0.0181402	0.240821
AL035420.2	2.54449	0.00110399	0.037442	-0.986774
MIR936	2.54322	0.00803544	0.104983	-2.70893
RN7SKP241	2.53968	0.00251624	0.0564018	-1.70784
LINC02753	2.53602	0.000238196	0.0168276	0.37203
AC005165.2	2.53495	0.0025929	0.0571551	-1.73396
AC005262.1	2.52794	0.001656	0.0462358	-1.3426
MARCKSL1P1	2.52648	3.43e-05	0.00620421	2.11061
AC130456.7	2.52521	0.000182622	0.0145363	0.609136
KLHL6-AS1	2.52415	0.00112099	0.0377601	-1.00022
RP11-157L3.5	2.52346	0.00247559	0.0560232	-1.69366
Z85986.1	2.52343	0.0100437	0.118591	-2.89865
MIR6835	2.52281	0.00243676	0.0556735	-1.67989
CEACAM5	2.51936	5.98e-05	0.00810416	1.60959
IGFL3	2.51616	0.00250017	0.0561875	-1.70226
AC104984.3	2.51597	0.00232721	0.0544963	-1.63981
TXLNGY	2.51406	0.0095872	0.1153	-2.85918
UNC93B5	2.5106	0.00145674	0.043112	-1.23028
MIR4768	2.50573	0.00625759	0.0925596	-2.49514
RNY1P13	2.50228	0.00611735	0.0915635	-2.47571
KLK3	2.49172	0.00170283	0.046962	-1.36701
AC025423.1	2.4916	0.00255769	0.0569445	-1.72206
MIR765	2.49126	0.00455382	0.0779909	-2.22188
AC103810.3	2.48961	0.00242807	0.0556382	-1.67678
AC012363.2	2.48815	0.00810801	0.105526	-2.7166
PPIAP51	2.48666	0.00035113	0.020902	0.0265162
PADI1	2.48199	9.48e-06	0.00293592	3.27268
AC092573.2	2.4808	0.00287043	0.0601234	-1.82237
DGAT2L7P	2.47947	0.000984787	0.0357062	-0.886212
LINC02262	2.47879	0.000628754	0.0279085	-0.490166
MIR555	2.47833	0.00796781	0.104551	-2.70172
AL513302.1	2.47788	0.000715402	0.0298823	-0.604304
AC004160.2	2.47766	0.00116617	0.0384963	-1.03496
FNDC1-IT1	2.47736	0.000168741	0.0139912	0.679769
RNA5SP449	2.47408	0.00890041	0.110639	-2.796
AC068134.2	2.47363	0.00356783	0.0676881	-2.01102
PPIAP45	2.47225	0.00210005	0.0516457	-1.55024
AF107885.1	2.46853	0.000291406	0.0188061	0.192388
SNORD51	2.46609	0.00473775	0.0796872	-2.25601
RNU6-761P	2.46205	0.00726865	0.100028	-2.62332
AC083809.1	2.45821	0.00171328	0.0471071	-1.37236
HOXA11-AS	2.45619	9.85e-06	0.00294343	3.23767
FAR1-IT1	2.45578	0.0025909	0.0571391	-1.73328
CRCT1	2.45017	0.00151167	0.0440545	-1.26273
SNORA74D	2.44473	0.0051381	0.083256	-2.32586
CHP2	2.4442	0.000657067	0.0286313	-0.529122
AL049830.4	2.4426	0.00268859	0.058112	-1.76548
CALML5	2.43869	0.00462557	0.078413	-2.23536
AC021739.1	2.43631	0.00734621	0.100611	-2.63239
AC036176.3	2.43629	0.00303956	0.0620536	-1.87209
AL354766.2	2.43625	0.00814645	0.105875	-2.72063
AC012568.1	2.4347	0.0013938	0.0420362	-1.19154
AL583836.1	2.4333	0.000219438	0.0160219	0.445186
H2BC14	2.43298	0.00517567	0.0835037	-2.33213
LINC02041	2.43161	0.000124681	0.0119352	0.95048
RNU1-134P	2.42989	0.00780638	0.10358	-2.68426
AC007272.2	2.42583	0.00158922	0.0450717	-1.30656
FOXC2-AS1	2.42528	0.000958559	0.0351727	-0.862437
AC107308.1	2.42418	0.00753772	0.101978	-2.65437
AC079171.1	2.42309	0.000222354	0.0161482	0.433411
AL023803.3	2.42086	0.00150566	0.0439872	-1.25923
AL512343.1	2.42035	0.00690759	0.0972706	-2.57977
CT83	2.41897	0.024421	0.191252	-3.64298
RP11-58E21.5	2.41809	0.00233087	0.0545192	-1.64118
LINC02244	2.40931	0.000445292	0.0238983	-0.184493
CEACAM18	2.40772	0.00644095	0.0938727	-2.51989
AL357137.1	2.40552	0.00481754	0.080368	-2.2704
AC093904.2	2.40141	0.000172962	0.0142958	0.657689
GJD3	2.3984	0.00178073	0.0479213	-1.40614
FTH1P25	2.39501	0.000812973	0.0322513	-0.717195
ALPI	2.39472	0.00153829	0.0443592	-1.27802
AL139400.1	2.39456	0.00195372	0.0498198	-1.48718
HOXB13	2.39235	0.00264088	0.0576295	-1.74991
AC093826.2	2.38734	0.00741405	0.100982	-2.64025
AC068299.1	2.38592	0.000592144	0.0271502	-0.437084
AC012531.2	2.38513	0.00052123	0.0257964	-0.324117
AC015818.3	2.38267	0.00451779	0.0776263	-2.21503
LINC01527	2.38123	0.000238805	0.0168328	0.369755
ALPG	2.37636	0.000286907	0.018626	0.206242
CSRP3-AS1	2.37551	0.00145141	0.0430673	-1.22706
AC015911.6	2.37402	0.00293899	0.0609063	-1.84288
AC023271.2	2.37396	0.000153872	0.013367	0.762235
AL590627.2	2.37231	0.0037121	0.0693258	-2.04534
AC005096.1	2.37126	0.00186458	0.0488803	-1.44637
PRLH	2.36995	0.00522515	0.0839043	-2.34031
AC083841.2	2.36753	0.00470701	0.079326	-2.2504
AL772337.1	2.36262	0.000578988	0.0269865	-0.417195
RNU6-577P	2.36064	0.0134632	0.139849	-3.14627
AC006600.2	2.35908	6.93e-05	0.00884023	1.47724
C1QBPP2	2.35826	0.000117421	0.011528	1.00421
AC040904.1	2.35296	0.00839331	0.10744	-2.74606
SPRR1B	2.3513	0.00224968	0.0534148	-1.61028
BX119321.1	2.35045	0.00146098	0.0431545	-1.23283
AC007556.1	2.34597	0.0118837	0.130474	-3.04104
RNU6V	2.3458	0.0123524	0.13364	-3.0737
AC007950.1	2.34488	0.00242151	0.0555591	-1.67442
MROH3P	2.34451	2.65e-06	0.00145632	4.43065
RNU6-140P	2.34411	0.0147684	0.147235	-3.22405
RNU1-56P	2.34321	0.00608057	0.0911688	-2.47054
AL160286.3	2.34319	0.000490186	0.0249912	-0.269689
AC004551.1	2.34187	0.0032929	0.0647314	-1.94154
MUC17	2.34102	0.00080859	0.0321242	-0.712425
AC090519.2	2.34093	0.00189362	0.0492088	-1.45988
AC074124.1	2.34015	0.00712294	0.0989914	-2.60602
MIR4748	2.33808	0.00304343	0.0620628	-1.8732
RNU6-48P	2.33805	0.0124305	0.133834	-3.07902
RPS10P18	2.33786	0.00271398	0.0584849	-1.77366
RTP2	2.33678	0.00139294	0.0420336	-1.191
AC008870.6	2.33663	0.000289794	0.0187365	0.197326
RNU6-704P	2.3366	0.0139874	0.142761	-3.1784
AL137229.1	2.33443	0.0142899	0.144731	-3.19639
CYMP-AS1	2.33166	0.00152974	0.0442459	-1.27314
AC009061.1	2.33062	0.00407064	0.0730783	-2.12506
U82695.1	2.33028	0.00079332	0.0316725	-0.695599
MIR554	2.32961	0.00765685	0.102723	-2.66776
AC010947.1	2.32453	0.00455477	0.0779909	-2.22206
AC108860.1	2.32327	0.00533282	0.0847834	-2.35785
AC108136.1	2.32073	0.00543836	0.0854883	-2.3747
PDIA3P2	2.32019	0.00805289	0.105135	-2.71078
RPS20P24	2.31769	0.00538621	0.0851844	-2.36642
AC073592.3	2.31594	0.000154169	0.0133714	0.760514
AC021037.2	2.3141	0.0114931	0.128005	-3.0128
LINC00705	2.31254	0.000212492	0.0158115	0.473889
AC005838.2	2.31135	0.0029478	0.0609079	-1.84548
AC111170.1	2.30843	0.0152198	0.149559	-3.24932
UGT1A10	2.30455	0.000186277	0.0146557	0.591437
LINC00615	2.30409	0.000555043	0.0265194	-0.379798
AC079915.1	2.30288	9.43e-05	0.0103358	1.20072
AC092431.2	2.30177	0.00572696	0.088132	-2.41912
AL136987.1	2.30105	0.00284032	0.0597553	-1.81321
AC008870.4	2.30042	0.000125845	0.0119808	0.94216
AC006262.4	2.29854	0.0152861	0.149749	-3.25296
AC136443.1	2.29828	0.0208143	0.177865	-3.51064
H3P23	2.29488	0.0028147	0.0595383	-1.80534
RN7SKP116	2.29355	0.00556814	0.0867025	-2.39497
AL353662.3	2.29082	0.00272558	0.0586255	-1.77737
KLKP1	2.28833	0.00103836	0.0362586	-0.932854
RNU6-87P	2.28645	0.00369686	0.0691485	-2.04178
LINC01825	2.28633	0.00212653	0.0518317	-1.56118
AC020661.3	2.28542	0.00386889	0.0711207	-2.08112
AL449283.1	2.28478	2.67e-05	0.0051714	2.33501
RPL7P14	2.28369	0.00144863	0.0430228	-1.22538
AL109924.1	2.28228	0.000194946	0.0150401	0.550814
AC010745.1	2.28042	0.00269255	0.0581745	-1.76676
AC090425.1	2.27967	0.0172353	0.159982	-3.35344
AC105219.2	2.27795	0.000186734	0.0146557	0.589246
CBX1P4	2.27781	0.00513921	0.083256	-2.32605
AC091076.1	2.27685	0.0033906	0.0658627	-1.96689
AC012170.1	2.27418	0.00166024	0.0462449	-1.34484
AC244394.1	2.27293	0.000592993	0.0271502	-0.438351
RPS15AP30	2.27127	0.00126884	0.0400646	-1.1091
AL365436.3	2.26579	0.0172932	0.160215	-3.35624
RPL12P44	2.26546	0.00225011	0.0534148	-1.61045
MIR200B	2.26492	0.0100696	0.118743	-2.90084
AL121832.1	2.26481	4.02e-05	0.00647427	1.96773
RNA5SP155	2.26374	0.0110647	0.125561	-2.98067
AL590640.3	2.26358	0.00803208	0.104983	-2.70857
AC090403.1	2.26156	0.000380843	0.0218355	-0.0456767
LINC01732	2.25784	0.00298553	0.0612719	-1.85652
PADI3	2.2571	0.000106366	0.0109589	1.09281
AL133370.2	2.25697	0.00246777	0.0559315	-1.6909
POU5F1P4	2.25693	0.00105216	0.0365258	-0.944469
RPL5P13	2.25622	0.00262013	0.0574069	-1.74305
AC009131.1	2.25166	0.0180416	0.164577	-3.39162
AC007849.1	2.25026	0.00648132	0.0941593	-2.52524
LINC02205	2.25017	0.0117723	0.129906	-3.03309
ALPP	2.24944	0.00106517	0.03672	-0.955284
AC089999.2	2.2494	0.0158556	0.152623	-3.28363
SRMP2	2.24897	0.00196564	0.0500069	-1.49249
MIR6753	2.2489	0.000724064	0.0300139	-0.614937
BX322784.1	2.24527	0.00145304	0.0430834	-1.22805
SAPCD2P3	2.24499	0.00294647	0.0609063	-1.84508
AC012354.3	2.24211	0.0411542	0.253316	-4.06938
AC073325.2	2.24122	0.0238753	0.189238	-3.62431
UGT1A7	2.23926	0.000147433	0.0130843	0.800467
AC009269.2	2.23832	0.00527466	0.0843511	-2.34842
AC007991.4	2.23794	0.00460812	0.0782647	-2.2321
AC008738.2	2.23793	0.00241912	0.0555591	-1.67356
MRPL53P1	2.23474	0.00650676	0.0943333	-2.5286
AC092071.1	2.23109	0.00280752	0.0594941	-1.80311
AC104791.1	2.23106	0.00241403	0.0555245	-1.67173
KRT13	2.23077	0.000209381	0.0156013	0.48705
Z99943.2	2.23064	0.0018223	0.0483945	-1.42632
GBP7	2.22908	0.000139277	0.0127657	0.851384
IQSEC3P1	2.22663	0.00415541	0.0739473	-2.14287
AC023825.2	2.22242	0.000604282	0.0273599	-0.455041
SEMG1	2.22119	0.00140859	0.0422251	-1.2008
KLK12	2.22062	0.00129221	0.0404398	-1.12512
MIR3972	2.21966	0.00609395	0.0912828	-2.47242
AC025062.2	2.21875	0.00335092	0.0652549	-1.95669
AC004817.2	2.21802	0.00474422	0.0797556	-2.25719
TMEM75	2.21678	0.000476691	0.024541	-0.244936
AC004080.1	2.21582	0.0137677	0.141464	-3.16509
AC092139.3	2.21487	0.000327631	0.0201723	0.088115
KRT16P2	2.21405	0.00118167	0.0387232	-1.04657
AL359880.1	2.20993	0.00300766	0.0616564	-1.86293
KRT18P18	2.20879	0.001292	0.0404398	-1.12498
RNY1P16	2.20704	0.0134965	0.139998	-3.14835
MIR4489	2.2069	0.0059142	0.0898419	-2.44674
RN7SL118P	2.20565	0.00712896	0.0990056	-2.60674
PGLYRP3	2.20546	0.00537091	0.0851653	-2.36397
ARHGAP26-IT1	2.20495	0.00723312	0.0996896	-2.61914
AC126389.1	2.20491	0.00853732	0.108222	-2.76055
SI	2.20469	0.00966644	0.115742	-2.86616
AL389886.1	2.20313	0.0161397	0.154173	-3.2985
CBX3P7	2.20261	0.00660949	0.0951194	-2.54201
ATG12P2	2.19766	0.00634055	0.093365	-2.50643
SPRR2D	2.19482	0.0164628	0.15586	-3.3151
AL162457.2	2.19317	0.00342281	0.0661995	-1.97508
AL772337.3	2.18941	0.0078358	0.103769	-2.68747
AL627308.1	2.18553	0.0024501	0.055861	-1.68464
EPS15P1	2.18536	0.00337659	0.0656475	-1.9633
RN7SKP296	2.18366	0.00143934	0.0428404	-1.21974
AP003472.1	2.18347	0.00203501	0.0509559	-1.52278
AC011479.1	2.18193	0.0262461	0.199012	-3.70242
AC015600.1	2.17883	0.00497889	0.0820984	-2.29877
AC004637.1	2.17862	0.00410682	0.073508	-2.13271
HOXC13	2.17773	0.0048826	0.0810809	-2.28195
RP4-784A16.3	2.17753	0.0130789	0.137694	-3.12188
PLA2G2F	2.17697	0.00204102	0.0510122	-1.52535
AC009065.7	2.17635	0.00672244	0.0957776	-2.55652
LYPD2	2.1743	0.0110985	0.125816	-2.98326
AL772337.2	2.17284	0.00114704	0.0381795	-1.02042
AP000609.1	2.17023	0.0253443	0.19509	-3.67361
AC079070.1	2.16993	0.0036377	0.0684179	-2.02781
REG4	2.16601	0.000804254	0.0320454	-0.707679
MIR135B	2.16561	0.0187281	0.167784	-3.42277
PRAC1	2.16558	0.00152765	0.0442459	-1.27194
AC003986.2	2.16481	0.000862774	0.0333524	-0.769644
RETNLB	2.16371	0.00849068	0.108064	-2.75589
AL158801.5	2.16334	0.00764911	0.102671	-2.6669
PPIAP40	2.16324	0.000657833	0.0286319	-0.530151
RNU6-45P	2.16224	0.0220401	0.183111	-3.55811
RNA5SP288	2.16043	0.0122338	0.132872	-3.06556
MIR6859-2	2.15514	0.0288558	0.209257	-3.78034
CAP2P1	2.15391	0.00118472	0.0387331	-1.04883
RN7SKP281	2.15348	0.0131184	0.137904	-3.12442
STPG4	2.15332	1.56e-05	0.00382135	2.8194
AL020995.2	2.15038	0.00427368	0.0754795	-2.1671
TEX49	2.149	0.00449508	0.0773824	-2.21068
TRAJ49	2.14787	0.0139486	0.142543	-3.17607
MIR548AR	2.14645	0.025108	0.193876	-3.66588
MIA-RAB4B	2.14638	0.00350847	0.0670288	-1.99649
AL158042.1	2.14599	0.00845835	0.107819	-2.75264
RNU6-403P	2.14538	0.00187192	0.0489955	-1.4498
AP001962.1	2.145	0.00278474	0.0592962	-1.79603
SCARNA4	2.14311	0.00700798	0.0981513	-2.59211
AP002358.1	2.14071	0.000352246	0.0209456	0.0236945
RPL7AP9	2.13993	0.0041771	0.0742271	-2.14736
UBBP3	2.13989	0.00482347	0.0804177	-2.27146
AC138028.3	2.13929	0.00510315	0.0830513	-2.31999
AC012354.9	2.13822	0.0030186	0.0617877	-1.86608
RN7SL57P	2.13435	0.00412826	0.0736757	-2.1372
H2BP9	2.13358	0.00713877	0.0991086	-2.60792
AC011365.2	2.13313	1.69e-05	0.00394331	2.75133
BX649553.2	2.13312	0.0272799	0.203338	-3.73421
AL354751.3	2.13069	0.00231964	0.0543957	-1.63698
AL161781.2	2.13055	0.0136355	0.140823	-3.15697
AC114812.3	2.13031	0.0019386	0.049633	-1.48039
AC110801.1	2.12898	0.00140695	0.0422226	-1.19978
AC023644.1	2.12862	0.00242946	0.0556467	-1.67728
AF228730.2	2.12843	0.00886089	0.110364	-2.79221
AC106900.1	2.12699	0.00675347	0.0960689	-2.56046
AL355490.1	2.12353	0.00188904	0.049118	-1.45776
AC068580.2	2.12333	0.00178069	0.0479213	-1.40612
MTND6P21	2.12175	0.00932532	0.113682	-2.83565
MIR205HG	2.12127	0.00831915	0.107069	-2.7385
RPS29P12	2.12093	0.0262612	0.199012	-3.7029
KRT8P23	2.11896	0.00127096	0.0400964	-1.11056
GTF2F2P1	2.11869	0.00223088	0.0532711	-1.60296
AC090709.1	2.11846	0.00644225	0.0938727	-2.52006
SNORD11	2.11818	0.0302491	0.214532	-3.81899
AC119744.1	2.11709	0.00181968	0.0483778	-1.42506
AC009097.4	2.11704	0.00476723	0.0798714	-2.26136
IFITM5	2.11651	0.00545178	0.0855756	-2.37682
RN7SL684P	2.11527	0.00736426	0.100732	-2.63449
HOXD10	2.11471	0.00052349	0.0258294	-0.327951
ALG1L5P	2.11301	0.00934102	0.113823	-2.83708
RN7SL648P	2.11289	0.013926	0.142521	-3.1747
LRRC26	2.11274	0.00585495	0.0892797	-2.4381
GPS2P2	2.11177	0.00312834	0.0629923	-1.89708
HOXB9	2.10737	1.02e-06	0.000830135	5.2979
AC109446.4	2.10638	0.000451608	0.0239982	-0.19699
ECEL1P2	2.10558	0.000552363	0.0265096	-0.37551
AC008543.3	2.10548	0.00409071	0.0733178	-2.12931
AC133473.1	2.10501	0.013856	0.142076	-3.17046
RPS3AP40	2.10396	0.00447208	0.0772552	-2.20626
AC134349.2	2.10319	0.00235592	0.0547527	-1.6505
C8orf74	2.10124	8.51e-05	0.00977439	1.29328
AL133370.1	2.10091	0.00504873	0.0826802	-2.31076
AC080125.1	2.1007	0.00458184	0.0781351	-2.22717
KLK6	2.10018	0.000571449	0.0268325	-0.405592
MT-TM	2.0984	0.0411345	0.253251	-4.06899
MYL10	2.09633	0.000129266	0.01215	0.918146
AC092724.1	2.09625	0.000463913	0.0242362	-0.220838
AL356273.5	2.0952	0.0224548	0.184419	-3.57356
INO80-AS1	2.09505	0.00311052	0.062796	-1.89212
AC106738.1	2.09432	0.0167585	0.157448	-3.32999
CAMP	2.09426	0.000179705	0.0143944	0.62352
CLCA4-AS1	2.09197	0.00605253	0.0909123	-2.46657
Z98742.3	2.09125	0.0124667	0.134064	-3.08147
KRT72	2.09108	0.00374243	0.0696292	-2.05238
VTA1P1	2.09061	0.00538633	0.0851844	-2.36644
RPS4Y1	2.08997	0.0273436	0.203546	-3.73613
RP11-268P4.6	2.08949	0.00558674	0.086868	-2.39783
AC002044.3	2.08922	0.00547795	0.0858906	-2.38094
ENO1P3	2.08915	0.00101593	0.0360962	-0.913625
LINC01655	2.08894	0.00449386	0.0773824	-2.21045
RPS3AP53	2.0876	0.00573701	0.0882235	-2.42063
GPR87	2.08724	0.000234539	0.0166992	0.385827
AC004801.1	2.08689	0.0108336	0.124124	-2.96281
AL135745.1	2.08412	0.00701232	0.0981869	-2.59264
AQP5	2.08305	2.05e-05	0.0043952	2.57492
AC073323.1	2.08215	0.00249228	0.0561012	-1.69951
BUB1P1	2.07949	0.00109253	0.0371925	-0.9776
MIR6750	2.07591	0.020492	0.176313	-3.49767
MIR3942	2.07041	0.00895056	0.110926	-2.80078
IGF2BP2-AS1	2.06822	0.000144397	0.0129786	0.819082
RNA5SP28	2.06777	0.0241819	0.190201	-3.63486
USP9Y	2.0676	0.0311638	0.217982	-3.84337
PRSS33	2.06623	0.000332403	0.020252	0.0752539
AC244093.2	2.06602	0.00837451	0.107391	-2.74415
RPS29P29	2.06571	0.00246644	0.0559315	-1.69043
AL645933.1	2.065	0.00547815	0.0858906	-2.38097
AL133373.1	2.0645	0.0380947	0.243452	-4.00688
MIR6124	2.06345	0.0342823	0.22965	-3.92121
AL583722.3	2.06058	0.00280796	0.0594941	-1.80325
AC009154.2	2.05873	0.00520217	0.0836442	-2.33652
AL354919.2	2.05846	0.000168764	0.0139912	0.679647
MIR4677	2.05843	0.0294206	0.211462	-3.79624
AC025031.3	2.05827	0.00781216	0.103632	-2.6849
RPS12P20	2.05712	0.00838515	0.107439	-2.74524
AC106772.2	2.05675	0.0176861	0.162586	-3.37501
AC012531.4	2.05644	0.0100398	0.118571	-2.89833
PHF5CP	2.05612	0.010621	0.122616	-2.94603
UBE2V1P1	2.05513	0.00571122	0.0880533	-2.41676
AC099342.1	2.05501	0.00622923	0.0923751	-2.49125
RN7SL748P	2.05445	0.00949799	0.114811	-2.85124
NPHS2	2.05351	0.00458038	0.0781351	-2.22689
AL359075.1	2.05263	0.00858877	0.10852	-2.76567
KRT76	2.05198	0.000401315	0.0225117	-0.0921868
LINC02474	2.04952	0.00715342	0.0992034	-2.60967
ELOBP2	2.04791	0.00732962	0.100536	-2.63046
AC114812.2	2.04655	0.0104526	0.121428	-2.93249
RNU6-50P	2.04548	0.0280493	0.206207	-3.75707
AC122718.2	2.045	0.00460409	0.0782452	-2.23134
AC020913.1	2.04432	0.00961915	0.115406	-2.862
AL592148.1	2.04399	0.00289021	0.060367	-1.82834
AL513174.1	2.04331	0.00470682	0.079326	-2.25037
MIR608	2.04182	0.0209824	0.178713	-3.51732
CKS1BP7	2.04181	0.0165747	0.156427	-3.32076
AL353997.2	2.04147	0.000915867	0.0344604	-0.822292
AC069200.2	2.03948	0.00524711	0.0840734	-2.34392
RNU6-199P	2.03755	0.0272568	0.203261	-3.73351
AC104435.2	2.03697	0.00498974	0.0822019	-2.30064
AC002558.1	2.03669	0.000524145	0.0258363	-0.329058
MIR3164	2.03655	0.040212	0.249945	-4.05067
HOXC8	2.03491	1.86e-08	8.44e-05	8.96121
MIR4728	2.03423	0.0398103	0.248897	-4.04255
RP11-655M14.13	2.03358	6.47e-05	0.00844632	1.53961
MYBPC1	2.03208	0.00021932	0.0160219	0.445666
AL031848.1	2.03183	0.0213415	0.18041	-3.5314
PSMC1P2	2.03167	0.00541721	0.0854209	-2.37135
AC012574.2	2.03086	0.0185983	0.167247	-3.41697
AP002498.1	2.02989	0.000720432	0.0299842	-0.610493
RPS27AP9	2.0297	0.00719109	0.0994627	-2.61416
SNORD121B	2.02894	0.0331196	0.225354	-3.89309
HOXC12	2.02868	0.00225413	0.0534282	-1.612
RNU6-195P	2.02747	0.0307433	0.216375	-3.83226
AL360181.3	2.02661	0.000714121	0.0298556	-0.60272
AC004923.2	2.02533	0.0033442	0.0651474	-1.95495
IVL	2.02523	0.0153978	0.150278	-3.25907
AC004924.1	2.02252	0.0324605	0.222874	-3.87668
AL032819.1	2.02235	0.0126985	0.135388	-3.097
PGBD4P1	2.02008	0.0156423	0.15136	-3.27228
AC005042.1	2.01944	0.00287106	0.0601234	-1.82256
AL359740.1	2.01898	0.00402168	0.0725858	-2.1146
MUC5AC	2.01855	0.000744339	0.0305982	-0.639331
HOXC9	2.01684	4.43e-11	8.04e-07	14.5115
SETP9	2.01663	0.0070489	0.0983906	-2.59708
AC008026.2	2.01655	0.0137134	0.141226	-3.16176
RP11-148O21.2	2.01578	0.0085884	0.10852	-2.76563
AC108516.2	2.0135	0.0128921	0.136589	-3.10976
C11orf86	2.01315	0.000215108	0.0159408	0.462969
AC084781.1	2.01314	0.0135905	0.140571	-3.15419
RPL12P11	2.01147	0.0111358	0.125996	-2.9861
AC072031.1	2.01071	0.0276349	0.204624	-3.74484
PCMTD1P3	2.01028	0.0117639	0.129871	-3.03248
MUCL3	2.00942	0.00537754	0.0851844	-2.36503
ASH1L-IT1	2.00897	0.0111392	0.125999	-2.98635
FUCA1P1	2.00849	0.00225767	0.0534889	-1.61337
AC004817.1	2.00695	0.00595023	0.0901212	-2.45195
MIR4284	2.00612	0.0428989	0.257369	-4.10287
SALRNA1	2.0058	0.00297506	0.0611724	-1.85347
AC027290.1	2.00564	0.0355589	0.233916	-3.95096
BARX1-DT	2.00515	0.00513424	0.083256	-2.32521
AC105105.3	2.00451	0.00872461	0.109445	-2.77903
LINC01500	2.00431	0.00266365	0.0579026	-1.75738
AC244093.1	2.00397	0.0057489	0.0883304	-2.42241
PRSS55	2.00287	0.00203569	0.0509559	-1.52307
RPS2P28	2.00017	0.00732105	0.100469	-2.62946
KRT17P8	1.99948	0.0093917	0.114108	-2.84168
AP001610.3	1.99861	0.0198276	0.172842	-3.47027
AC009533.3	1.99802	0.0125442	0.134336	-3.08669
MIR4804	1.99795	0.0023118	0.0543585	-1.63402
RPL36AP21	1.99623	0.0151004	0.149056	-3.24271
AC055764.1	1.99331	0.0114962	0.128005	-3.01303
AC004009.1	1.99322	0.0157938	0.152285	-3.28035
H3P25	1.99273	0.00996395	0.118007	-2.89189
HOXB1	1.99258	0.00714782	0.0991664	-2.609
CASC9	1.99232	0.0245708	0.191792	-3.64803
TRBJ2-1	1.99167	0.0282647	0.206928	-3.76335
FGF8	1.98893	0.00385027	0.0708263	-2.07695
AC145285.4	1.98847	0.0278014	0.205299	-3.74978
AL033381.2	1.98827	0.00608093	0.0911688	-2.47059
MIR4777	1.98807	0.00878986	0.10996	-2.78537
AC130651.1	1.98798	0.00928055	0.113365	-2.83156
AC004080.12	1.98381	0.00776664	0.103355	-2.67991
AL359694.1	1.98174	0.00858427	0.10852	-2.76522
MIR7854	1.98151	0.0103129	0.120623	-2.92108
CBY2	1.98128	0.0117403	0.129711	-3.03079
AP003555.2	1.98059	4.5e-05	0.0068313	1.86482
AC004808.2	1.98025	0.0124172	0.133796	-3.07811
AC097716.1	1.98018	0.0297457	0.212589	-3.80525
FAM242C	1.97998	0.000633811	0.0279987	-0.497253
AC087276.1	1.97938	0.0421582	0.256796	-4.08883
RNU6-786P	1.97821	0.00991249	0.117575	-2.8875
AP000619.3	1.97805	0.00796195	0.10451	-2.7011
AC111186.2	1.97759	0.034977	0.231599	-3.93754
RNU6-343P	1.97724	0.0132386	0.138669	-3.1321
TINAG	1.97639	0.002177	0.0524445	-1.58164
AC069499.3	1.97534	0.0168161	0.15773	-3.33286
MIR6797	1.97481	0.0131913	0.13836	-3.12909
AC023794.2	1.97464	5.37e-10	5.23e-06	12.2164
AC133644.2	1.97408	9.66e-05	0.0103944	1.1795
AC013726.2	1.97272	0.000625221	0.0278679	-0.485182
IRGC	1.97004	0.00249084	0.0561012	-1.699
AC011465.1	1.96921	0.00291143	0.0606675	-1.83469
TMPRSS11D	1.96717	0.00193573	0.049633	-1.4791
AC069236.1	1.96658	0.00971184	0.116082	-2.87014
AC010287.1	1.96575	0.00390864	0.0714655	-2.08996
EN2	1.96478	0.00448742	0.0773728	-2.20921
MIR3174	1.96342	0.0464241	0.265975	-4.16637
SNRPCP9	1.96234	0.00695542	0.0976664	-2.58567
AC243967.2	1.95994	0.00340084	0.0659169	-1.9695
AL355076.1	1.95993	0.00946223	0.114684	-2.84803
Z99127.3	1.95905	0.0159956	0.153395	-3.29099
AL353583.1	1.9584	0.000929637	0.0346812	-0.835443
BECN2	1.9583	0.00744237	0.101216	-2.6435
AC020891.2	1.95807	0.0278869	0.20554	-3.7523
AL137802.1	1.95806	0.018441	0.166404	-3.40989
IGLV2-5	1.95759	0.0311791	0.218006	-3.84377
MIR4644	1.95721	0.0388378	0.245779	-4.02253
AL035425.1	1.95637	0.0383217	0.244072	-4.0117
AC007906.1	1.95451	0.00399473	0.0723835	-2.10879
AL390037.1	1.95419	0.00816032	0.105979	-2.72208
RNU6-1149P	1.95418	0.00832563	0.107103	-2.73917
FER1L6-AS1	1.95328	0.00660824	0.0951194	-2.54185
AC092851.1	1.95245	0.0262312	0.199012	-3.70195
ERCC8-AS1	1.95165	0.00885557	0.110364	-2.7917
AL356320.1	1.95134	0.00959136	0.115309	-2.85954
APOBEC1	1.95127	0.0011937	0.0388522	-1.05547
RPS24P12	1.95098	0.0128274	0.136063	-3.10552
RNU1-72P	1.95071	0.0366746	0.238149	-3.97607
SCARNA20	1.95055	0.036174	0.236238	-3.9649
VDAC1P11	1.95014	0.00912483	0.112262	-2.81718
Z93242.1	1.94881	0.011919	0.13073	-3.04355
AP000807.1	1.9482	0.0377412	0.242251	-3.99933
PCSK6-AS1	1.94776	0.0120298	0.131442	-3.05136
KRT9	1.94587	0.00388459	0.071217	-2.08462
UBBP5	1.94544	0.0289498	0.20963	-3.78301
AC027801.4	1.9444	0.019641	0.172167	-3.4624
RP11-685M7.5	1.94209	0.0157603	0.152177	-3.27857
AC068189.1	1.93824	0.00794856	0.104444	-2.69966
GAU1	1.93794	0.00205356	0.0510122	-1.5307
GLIS3-AS1	1.93766	0.00225154	0.0534148	-1.611
AC092685.1	1.93369	0.00283388	0.0597213	-1.81124
SERPINB3	1.93352	0.00511701	0.0831235	-2.32232
NANOGP7	1.93238	0.00156105	0.0447404	-1.29089
AC021127.1	1.93157	0.013597	0.140585	-3.15459
AL513008.1	1.93031	0.0331649	0.225521	-3.8942
FLNC-AS1	1.93016	0.0178586	0.163703	-3.38311
AL591806.1	1.93003	0.000339607	0.0204847	0.0561858
AL606517.1	1.92902	0.00242156	0.0555591	-1.67444
MSLN	1.92815	7.61e-06	0.00265034	3.47181
AC097460.2	1.92808	0.0168488	0.157955	-3.33448
AC093732.1	1.92678	0.00377197	0.0698653	-2.05918
SULT1C2P1	1.92424	0.00413218	0.0737127	-2.13802
RN7SKP137	1.92408	0.00445816	0.0771535	-2.20357
AC007240.1	1.92381	0.0415887	0.255032	-4.07786
ATP5MC2P3	1.92299	0.0138099	0.141702	-3.16766
AC120036.1	1.92223	0.00737231	0.10074	-2.63542
AC025154.2	1.92059	0.000203781	0.0153308	0.511247
WWC3-AS1	1.92042	0.00625579	0.0925596	-2.4949
MIR3183	1.92	0.0206517	0.177074	-3.50412
OMP	1.91957	0.000671143	0.0290125	-0.547862
RNA5SP18	1.9194	0.0189685	0.16904	-3.43339
CDC42P3	1.91936	0.0141903	0.144062	-3.19051
AC008687.3	1.91928	0.00778488	0.103514	-2.68191
BX255925.2	1.91914	0.0180514	0.16459	-3.39208
AL020997.2	1.91743	0.0200315	0.174015	-3.47878
ZNF29P	1.91723	0.0311618	0.217982	-3.84332
AC067940.1	1.91651	0.0206247	0.177022	-3.50303
AL136982.3	1.91573	0.00996012	0.117988	-2.89157
RNU6-595P	1.91555	0.0378861	0.242776	-4.00243
AL353626.2	1.91554	0.0400661	0.24955	-4.04773
TBX18-AS1	1.91508	0.00473226	0.0796554	-2.25501
OSBPL10-AS1	1.91184	0.00131207	0.0406286	-1.13851
AL034417.1	1.91178	0.00767732	0.10281	-2.67004
RPL37P1	1.91142	0.0181222	0.165008	-3.39534
AC005070.2	1.91056	0.00615275	0.0919418	-2.48066
SNORA70F	1.91053	0.0376389	0.241901	-3.99712
B3GNT6	1.91041	0.00273346	0.0587322	-1.77988
SNRPFP4	1.90891	0.0068526	0.0968718	-2.57293
MIR1255A	1.90787	0.0036298	0.0683718	-2.02593
SNORA38	1.90684	0.0302207	0.214387	-3.81822
AC008870.1	1.90667	0.000200495	0.0152521	0.525758
AL158801.1	1.90585	0.0218049	0.18233	-3.54922
AC008635.2	1.9057	0.0102247	0.119918	-2.9138
AC005237.2	1.9056	0.00746622	0.101389	-2.64623
AC079781.2	1.9044	0.0157724	0.152186	-3.27922
HSPE1P5	1.90398	0.026665	0.200884	-3.71546
PRICKLE2-DT	1.90297	0.010409	0.121146	-2.92895
AL596223.1	1.90267	0.000150006	0.0132423	0.784996
AC007663.2	1.90146	0.000862266	0.0333524	-0.769124
AC020910.3	1.90088	0.00846863	0.107898	-2.75367
ZIC5	1.9005	0.0071717	0.0994008	-2.61185
RPS26P41	1.9	0.0282735	0.206962	-3.76361
AC217773.1	1.89946	0.00359097	0.0680559	-2.01662
RN7SL368P	1.89928	0.0013584	0.0414979	-1.16897
AC022400.10	1.8977	0.0244467	0.191305	-3.64385
AC102953.1	1.89769	0.00518324	0.0835345	-2.33339
RPL12P41	1.89737	0.0172249	0.15994	-3.35294
RPS12P17	1.89625	0.0167311	0.157285	-3.32862
AC110813.1	1.89599	0.00182357	0.0484046	-1.42693
ARHGEF9-IT1	1.89569	0.0133892	0.139509	-3.14162
MROH2A	1.89511	0.0014097	0.0422334	-1.20149
NPM1P21	1.89315	0.00315719	0.0633625	-1.90504
SNORD13E	1.89109	0.0493318	0.27497	-4.21504
LCE1E	1.88941	0.0070351	0.098332	-2.59541
AL158801.3	1.88864	0.0145568	0.1461	-3.21194
SNORA36B	1.8846	0.0118556	0.130354	-3.03905
KRTAP4-1	1.88415	0.0413934	0.254277	-4.07406
HOXC5	1.8836	8.71e-07	0.000818237	5.44257
AC005256.1	1.88202	0.00918348	0.112735	-2.82262
AC079174.1	1.88043	0.0226663	0.185542	-3.58132
AL355096.1	1.88003	0.0256201	0.196283	-3.68253
AL138776.1	1.87964	0.0189275	0.168924	-3.43159
AL683842.1	1.8779	0.0123714	0.1337	-3.075
AL021368.1	1.8769	0.0163186	0.155067	-3.30773
AC092375.1	1.87591	0.0105521	0.122132	-2.94051
AL356417.1	1.87564	0.0166146	0.156603	-3.32277
AC073283.1	1.8746	0.00010346	0.0107134	1.11764
AC061992.1	1.87162	0.010973	0.124985	-2.97363
AL353803.3	1.87143	0.0196143	0.172093	-3.46127
BPIFB1	1.87084	0.000889457	0.0338553	-0.7965
LYZL4	1.87059	0.0106241	0.122627	-2.94628
PPP1R2P1	1.8699	0.00902028	0.111322	-2.80738
AC036222.3	1.86911	0.00627697	0.0927548	-2.49779
MIR616	1.8684	0.00654037	0.0945383	-2.53301
AL645933.2	1.86738	0.0129043	0.136666	-3.11056
OXT	1.86642	0.00131139	0.0406286	-1.13806
MTND4P20	1.86589	0.00153051	0.0442459	-1.27358
PDCL2	1.86486	0.0145981	0.146351	-3.21431
AC108861.1	1.86454	0.00400544	0.0724571	-2.11111
OR7E62P	1.86371	0.0335364	0.226858	-3.90329
METTL11B	1.86322	0.0074628	0.101389	-2.64584
AC035139.1	1.86296	0.032783	0.224044	-3.88475
DSG3	1.86276	0.000788623	0.0316188	-0.690357
GIP	1.86231	0.0203798	0.175771	-3.49311
BCL2L1-AS1	1.86207	0.000572999	0.026859	-0.40799
AC114489.1	1.862	0.048871	0.273892	-4.20753
LGALS7B	1.86188	0.00333857	0.0650843	-1.95349
AL357140.3	1.86187	0.0165542	0.156296	-3.31973
AC011526.1	1.86109	0.00231378	0.0543585	-1.63477
SHANK2-AS3	1.8607	0.000818125	0.032327	-0.722769
HOXD12	1.85855	0.00376686	0.0698653	-2.05801
AC026355.4	1.85835	0.0160601	0.15379	-3.29436
SUMO2P19	1.85834	0.00995628	0.117988	-2.89124
AC003101.2	1.85825	0.00330968	0.0648226	-1.94595
AC004009.3	1.85821	0.0278179	0.20532	-3.75027
ANKRD40CL	1.85729	0.000480498	0.0246671	-0.25199
AC108479.3	1.85706	0.0394164	0.247606	-4.0345
IGFL1P1	1.85505	0.00568285	0.0878451	-2.41248
AP003351.1	1.85492	0.0190381	0.16919	-3.43644
KRT6A	1.85337	0.00965231	0.115599	-2.86492
BOLA2P3	1.8529	0.0294729	0.211618	-3.7977
SOCS5P2	1.85222	0.00829035	0.106954	-2.73555
AC005776.1	1.85153	0.0251553	0.194103	-3.66743
LINC00111	1.8508	0.0178392	0.163552	-3.3822
ACTG1P12	1.85072	0.00868243	0.109042	-2.7749
WFDC12	1.85071	0.0180661	0.164607	-3.39275
SMIM23	1.85068	0.0253213	0.19494	-3.67286
SYT8	1.84969	0.000584502	0.027037	-0.425586
RN7SL812P	1.849	0.0219227	0.182554	-3.55369
RP11-148O21.4	1.84886	0.0435533	0.257369	-4.11506
DMBX1	1.84872	8.94e-05	0.0100579	1.24889
RNU6-593P	1.84858	0.0477407	0.270053	-4.1888
CAPZA3	1.84838	0.0220155	0.183103	-3.55719
SLC9A4	1.84826	0.0030684	0.0622404	-1.88029
AC135782.1	1.84809	0.00198921	0.0503011	-1.50291
ITCH-IT1	1.8479	0.0317447	0.220008	-3.85847
HCG4P8	1.84724	0.0155112	0.150712	-3.26522
AL133153.1	1.84693	0.0185349	0.16703	-3.41412
AC060773.1	1.84655	0.0113946	0.127494	-3.00553
GSX2	1.84559	0.00530586	0.0846265	-2.3535
AC114812.4	1.84555	0.01358	0.140542	-3.15354
H3-4	1.84507	0.022087	0.183194	-3.55988
AC093001.1	1.84467	0.0315842	0.219234	-3.85433
LINC01048	1.84422	0.0129535	0.136876	-3.11376
RNA5SP498	1.84415	0.019691	0.172321	-3.46452
LINC01629	1.8433	0.0214162	0.180608	-3.5343
LINC01839	1.8433	0.0194377	0.171048	-3.45374
AL359314.1	1.84144	0.0427307	0.257369	-4.0997
RNU6-554P	1.84122	0.0432092	0.257369	-4.10868
AC092184.3	1.84012	0.00543834	0.0854883	-2.3747
AL136296.1	1.83987	0.0367439	0.238428	-3.9776
AC007255.2	1.83946	0.00110713	0.0375253	-0.989275
MIR548I2	1.83929	0.028393	0.207364	-3.76707
DNAJB3	1.83848	0.00960541	0.115355	-2.86079
AC090578.2	1.83845	0.0272244	0.203232	-3.73254
MRPL9P1	1.83836	0.00517881	0.0835295	-2.33265
AL354710.1	1.83772	0.0355538	0.233911	-3.95085
AC009269.5	1.83753	0.000112124	0.011286	1.04557
RAP2CP1	1.83742	0.0184654	0.166491	-3.41099
UNC93B7	1.83736	0.0145366	0.146016	-3.21077
AC104237.2	1.83667	0.0125261	0.134305	-3.08548
BNIP3P25	1.8366	0.0161526	0.154237	-3.29917
AL928970.1	1.83623	0.0129166	0.136763	-3.11136
ATP5F1CP1	1.83447	0.00754714	0.102014	-2.65544
ZMYND19P1	1.8339	0.0109353	0.124713	-2.97072
RNU6-884P	1.83348	0.0222886	0.183839	-3.5674
RNU6-171P	1.83266	0.0102652	0.120237	-2.91715
Z84723.1	1.83262	0.00462058	0.0784031	-2.23443
AL354861.3	1.83178	0.0021714	0.0523952	-1.5794
AP005436.3	1.83162	0.0302611	0.21459	-3.81932
AC091946.2	1.83156	0.0398429	0.248985	-4.04321
LINC02783	1.83126	0.00174042	0.0474684	-1.38611
AL121776.1	1.83124	0.0123843	0.133759	-3.07587
AC007899.1	1.8305	0.015354	0.150171	-3.25668
SPATA20P1	1.83007	0.00510671	0.0830513	-2.32059
AL034555.1	1.8297	0.0130903	0.137752	-3.12262
FCRL4	1.82963	0.00196214	0.0499411	-1.49094
CTSLP8	1.82961	0.00805272	0.105135	-2.71076
AC012317.1	1.82952	0.016861	0.158023	-3.33509
AC006254.2	1.82942	0.0315468	0.219142	-3.85336
SEPTIN9-DT	1.82696	7.3e-05	0.0090623	1.43006
AC007216.2	1.82588	0.00139751	0.0420784	-1.19388
AC002347.2	1.8246	0.0408851	0.252458	-4.06408
AC006461.1	1.82397	0.0056595	0.087699	-2.40895
RNVU1-30	1.82327	0.0132794	0.138937	-3.1347
AC011816.1	1.82325	0.0214405	0.180733	-3.53524
SOX21	1.82318	0.00325055	0.0643314	-1.93032
AC005740.1	1.82305	0.0121731	0.1324	-3.06136
TRGV9	1.82268	0.00361101	0.068267	-2.02144
AC016065.2	1.82123	0.0155318	0.150746	-3.26634
SNORD59A	1.82093	0.0391033	0.246748	-4.02805
AC113410.4	1.82093	0.0294274	0.211462	-3.79643
MTND4P23	1.82035	0.00382126	0.0705068	-2.07041
CLDN10-AS1	1.82007	0.00318245	0.0636025	-1.91196
SNORD72	1.81998	0.040473	0.250794	-4.05589
AP001434.1	1.81925	0.0052231	0.0838961	-2.33998
DQX1	1.81913	1.85e-05	0.00418327	2.66548
MTND5P25	1.819	0.0143603	0.145036	-3.20052
ABCC13	1.81796	0.00148691	0.0435659	-1.24825
PTCHD3P2	1.81765	0.00135899	0.0414979	-1.16935
CYP4F23P	1.81658	0.00136662	0.0415618	-1.17427
RPL23AP55	1.81627	0.0195364	0.17163	-3.45796
AC113139.1	1.81614	0.00026815	0.0178491	0.266461
AC010768.2	1.81541	0.00544657	0.0855432	-2.376
MIR1249	1.81468	0.00616483	0.0919458	-2.48234
LINC02700	1.81425	0.0306484	0.21596	-3.82973
TGM5	1.81421	0.000121711	0.0117334	0.972067
MIR378J	1.81328	0.00334064	0.0651013	-1.95402
AC022165.1	1.81282	0.00620684	0.0920932	-2.48816
RPS24P17	1.81259	0.0155909	0.151032	-3.26952
AC113346.1	1.81256	0.00786467	0.103952	-2.69061
AC073592.10	1.81251	0.0244486	0.191305	-3.64392
MOGAT3	1.81213	0.000519306	0.0257674	-0.320841
AC137055.1	1.81039	0.0108836	0.124566	-2.96671
AL161431.1	1.81008	0.0215905	0.181529	-3.54103
SOX21-AS1	1.80978	0.000363511	0.0212493	-0.00428626
TAS2R38	1.80914	0.0345507	0.230598	-3.92756
AL713965.1	1.80837	0.0461845	0.265356	-4.16222
AC106037.3	1.80784	0.0114942	0.128005	-3.01288
IGHV3-42	1.80752	0.0355134	0.233877	-3.94992
AC005529.1	1.80648	0.0218	0.18233	-3.54903
AC007599.2	1.80545	0.00274551	0.0588982	-1.7837
AL359851.1	1.805	0.0106895	0.123094	-2.95147
TRIM31	1.80471	2.32e-06	0.00140183	4.55003
AC100843.1	1.80452	0.000703069	0.0296899	-0.588939
AC116348.6	1.80337	0.0157226	0.151975	-3.27657
S100P	1.80201	4.19e-05	0.00654291	1.92904
PSMC1P7	1.80146	0.0137935	0.141649	-3.16666
SETD6P1	1.80073	0.0285901	0.208189	-3.77275
AP006748.1	1.80058	0.0268874	0.201945	-3.72229
SPDYE16	1.79953	0.00791775	0.104243	-2.69635
DHRS9	1.79812	6e-06	0.00231895	3.68756
HMGCS2	1.79791	0.000364144	0.0212493	-0.00583347
OVOL1-AS1	1.79702	0.00794702	0.104444	-2.6995
AC239804.2	1.79656	0.0227244	0.185793	-3.58344
SERPINB5	1.79635	0.000274069	0.0180861	0.247011
AC008957.2	1.79583	0.0124051	0.133785	-3.07729
MYEOV	1.79523	1.17e-05	0.00322119	3.08546
GJB4	1.79509	0.000305265	0.0192667	0.15103
AF230666.2	1.79337	0.0171242	0.159496	-3.34804
AC089998.1	1.79318	0.00340428	0.0659169	-1.97038
ADGRG7	1.79269	0.000548889	0.026421	-0.369923
AL049569.1	1.79209	0.0102757	0.120313	-2.91802
AL161672.1	1.79193	0.0134099	0.139551	-3.14293
AC090515.6	1.7918	0.0149435	0.148152	-3.23395
RPL3P13	1.78885	0.042483	0.257369	-4.09502
AL603832.3	1.78868	0.00345365	0.0664728	-1.98285
RPL7P18	1.78805	0.0194404	0.171048	-3.45386
CYP2B6	1.78646	0.000224808	0.0162614	0.423619
AC084871.1	1.78638	0.00189916	0.0492822	-1.46243
KRT12	1.78634	0.00364991	0.0685765	-2.03072
AC007001.1	1.78572	0.0160642	0.153794	-3.29458
AL713999.1	1.78423	0.0240646	0.189625	-3.63084
AC074366.1	1.78407	0.00970977	0.116082	-2.86996
EVX1	1.78402	0.00513794	0.083256	-2.32583
AL138963.1	1.78378	0.00388011	0.0711828	-2.08363
RN7SL220P	1.7837	0.0158677	0.1527	-3.28427
AL096855.1	1.78365	0.0487114	0.273414	-4.20491
NPSR1	1.78327	0.0232218	0.187105	-3.60136
TRAJ9	1.78275	0.0417091	0.255432	-4.08019
TRBV23-1	1.78208	0.0330101	0.224862	-3.89039
RNF216-IT1	1.78165	0.0363933	0.237142	-3.96981
AL583722.4	1.78001	0.0189903	0.169069	-3.43435
IL19	1.77986	0.000268227	0.0178491	0.266203
RN7SL239P	1.77966	0.0362083	0.236298	-3.96567
RPL29P14	1.77948	6.33e-05	0.00838836	1.55871
MIR200A	1.77856	0.00886271	0.110364	-2.79239
AC023794.7	1.77779	1.03e-07	0.000294529	7.39561
PFN1P9	1.77766	0.00618948	0.0920362	-2.48576
MMP13	1.77629	0.000216309	0.0159863	0.458001
AL021920.2	1.77608	0.00516031	0.0834169	-2.32957
RNU6-19P	1.77499	0.00723045	0.0996781	-2.61882
AC108159.1	1.77478	0.0113044	0.127217	-2.99881
MTCYBP21	1.77296	0.00449494	0.0773824	-2.21065
GAPDHP14	1.77287	0.00353573	0.0673607	-2.0032
NPY4R	1.7726	0.00167488	0.0464025	-1.35252
NCR2	1.77231	0.0143363	0.144847	-3.19911
AC114772.1	1.77211	0.0150921	0.149056	-3.24225
RPL7P50	1.77161	0.00234957	0.0547527	-1.64815
AC108449.1	1.77156	0.0194111	0.170998	-3.4526
AC025575.2	1.7709	0.00421213	0.0747317	-2.15457
AC005304.3	1.77045	0.0206516	0.177074	-3.50412
HNRNPA1P63	1.7703	0.0044819	0.0773022	-2.20815
RNU6-689P	1.77026	0.0453023	0.262503	-4.14673
RN7SKP269	1.77017	0.02794	0.205821	-3.75386
MSMB	1.77016	0.0265007	0.200394	-3.71037
AP006289.1	1.76932	0.00180385	0.0481156	-1.41742
NANOGP2	1.76894	0.00639985	0.0937565	-2.5144
RN7SL49P	1.76752	0.0260672	0.198328	-3.69679
AC010729.2	1.7671	0.0148135	0.147462	-3.22661
Z98749.1	1.76692	0.0164737	0.15586	-3.31565
AQP2	1.76684	0.000833461	0.0327146	-0.739155
ABHD17AP6	1.76657	0.0160159	0.153515	-3.29205
RPL23AP36	1.76637	0.00494756	0.0818104	-2.29333
AL035420.1	1.76601	0.00964925	0.115587	-2.86465
NAT2	1.76553	0.000115055	0.0114647	1.02244
AC018644.1	1.76533	0.0068634	0.096949	-2.57427
SNX29P1	1.76524	0.00193141	0.0496259	-1.47714
MIR152	1.76484	0.00699394	0.0980105	-2.59039
RN7SKP287	1.76432	0.0252281	0.194408	-3.66982
AC104984.4	1.76397	0.0237168	0.188613	-3.61881
PPIAP65	1.76329	0.00374807	0.0696519	-2.05368
MTND5P12	1.7621	0.00801692	0.104917	-2.70696
AC024619.3	1.76205	0.0214485	0.180733	-3.53555
AL139039.1	1.7614	0.0108991	0.124593	-2.96792
MTCO3P22	1.76138	0.0218083	0.18233	-3.54935
AC006947.1	1.76014	0.0247272	0.192368	-3.65327
AC130472.1	1.75859	0.026562	0.200635	-3.71227
ABCG8	1.75827	0.00651835	0.0944259	-2.53012
RN7SL851P	1.75733	0.0380193	0.243084	-4.00528
AL596223.2	1.75584	0.00629982	0.0929883	-2.50091
MGAT4EP	1.75535	0.00499836	0.0822262	-2.30213
AF131215.1	1.75531	0.0114683	0.127924	-3.01098
RANP8	1.75329	0.020373	0.175771	-3.49283
HSPE1P25	1.75306	0.00802715	0.104976	-2.70805
AL353593.2	1.75262	0.00852277	0.108179	-2.7591
RN7SL566P	1.75126	0.00205231	0.0510122	-1.53017
AL096870.1	1.75069	0.00752036	0.101794	-2.6524
OR2B6	1.75054	0.00958227	0.115282	-2.85874
RNU6-1099P	1.75042	0.0309746	0.217217	-3.83839
KRT18P64	1.74862	0.00953232	0.115024	-2.8543
KRT8P10	1.74832	0.00103261	0.0362501	-0.927966
PPIAP90	1.7477	0.0236628	0.188391	-3.61692
AC099804.1	1.74506	0.00642761	0.0938727	-2.51811
AC073592.7	1.74453	0.0270977	0.202795	-3.7287
AP006219.1	1.74312	0.020176	0.17471	-3.48476
TRAV27	1.74288	0.00953851	0.115045	-2.85485
AL138898.1	1.74107	0.0466242	0.266533	-4.16982
MTND2P12	1.74047	0.00143751	0.0428092	-1.21862
AC009093.7	1.73956	0.00316103	0.0633928	-1.9061
RPL8P2	1.7394	0.0232549	0.187139	-3.60254
LINC02189	1.73818	0.00809988	0.105521	-2.71574
AC021016.3	1.73712	0.00453575	0.077861	-2.21845
RNU6-484P	1.73652	0.0312979	0.218394	-3.84688
AC002306.1	1.73568	0.0132338	0.138646	-3.1318
RNU6-574P	1.73542	0.00863447	0.10874	-2.77019
AC103563.7	1.73456	0.0421708	0.256805	-4.08907
LINC02832	1.73321	0.00467633	0.0790535	-2.24477
AL159972.1	1.73278	0.0357723	0.234611	-3.95583
LRRC31	1.73118	0.000219231	0.0160219	0.44603
BTF3P5	1.73112	0.00717432	0.0994075	-2.61216
AP001486.1	1.73085	0.0292885	0.211016	-3.79255
AC118754.2	1.7305	0.0264934	0.200394	-3.71014
SKAP1-AS1	1.72995	0.0182513	0.165686	-3.40126
NR1I2	1.7295	9.89e-06	0.00294343	3.23423
AC004990.1	1.7294	0.00112093	0.0377601	-1.00017
TM4SF20	1.72892	0.0119338	0.130813	-3.04459
AP004609.3	1.72782	0.00201378	0.0506202	-1.51362
RPL15P21	1.72766	0.0240995	0.189744	-3.63204
AC026401.2	1.7276	0.0242402	0.190455	-3.63684
AL353804.2	1.72735	0.0157413	0.152048	-3.27757
SCARNA5	1.72699	0.0299825	0.213531	-3.81174
VPS26BP1	1.72681	0.0029405	0.0609063	-1.84332
HSPE1P8	1.7258	0.0370694	0.239741	-3.98476
RNU6-1164P	1.72517	0.0114263	0.127666	-3.00788
AC026355.3	1.72502	0.0346427	0.230702	-3.92973
ELOCP2	1.7244	0.0237977	0.188924	-3.62162
LRRIQ4	1.72406	9.81e-05	0.0104701	1.16522
LCN1	1.7236	0.0082852	0.106938	-2.73502
AC013564.1	1.72348	0.00685082	0.0968718	-2.5727
AC093801.1	1.72314	0.0392547	0.247239	-4.03118
LINC01819	1.72287	0.000883517	0.0337708	-0.790593
AL391994.1	1.72281	0.00868847	0.109042	-2.77549
AC005521.1	1.72243	0.0166007	0.156546	-3.32208
SEM1P1	1.72193	0.0371833	0.240248	-3.98725
KRT18P60	1.72033	0.00735977	0.100696	-2.63397
HNRNPA1P20	1.71942	0.00456245	0.0780721	-2.22351
GRK5-IT1	1.71875	0.0356018	0.234028	-3.95194
SULT1C3	1.71843	0.0313775	0.218607	-3.84896
MAP3K20-AS1	1.71839	9.75e-05	0.0104348	1.17072
AC127030.1	1.71826	0.0438527	0.258056	-4.12058
AL512288.2	1.71797	0.00404502	0.072757	-2.11961
RP5-916L7.2	1.71785	0.0348638	0.231256	-3.9349
H2AC17	1.71695	0.0107321	0.123298	-2.95484
AL645939.3	1.71667	0.0225338	0.184761	-3.57647
PTBP1P	1.71645	3.84e-05	0.00638819	2.0096
AL133255.1	1.71579	0.0293547	0.211244	-3.7944
AC091180.5	1.71528	0.0265982	0.200698	-3.71339
LINC02115	1.71517	0.0168966	0.158189	-3.33685
H1-3	1.71474	0.00580663	0.0889405	-2.43098
CSTL1	1.71241	0.0365689	0.237732	-3.97372
MIR5684	1.71233	0.0393742	0.24753	-4.03364
LINC02253	1.71209	0.0348016	0.231087	-3.93345
CDSN	1.71069	0.00256993	0.0569946	-1.72621
AC011483.3	1.71061	0.0211444	0.1795	-3.5237
UGT1A8	1.71036	0.0055132	0.0862168	-2.38645
COX4I1P2	1.70998	0.0110855	0.125714	-2.98226
AC004223.2	1.70978	0.00595444	0.0901212	-2.45256
AC126124.2	1.70849	0.013586	0.14056	-3.15391
AC110772.1	1.70822	0.0294018	0.211386	-3.79571
MOGAT2	1.7082	4.16e-05	0.00654291	1.93529
PEBP1P3	1.70773	0.0242536	0.19046	-3.6373
MIR221	1.70763	0.00934467	0.113841	-2.83741
RNU6-1069P	1.70762	0.0456247	0.263343	-4.15243
AC148477.3	1.70713	0.0199025	0.173226	-3.47341
ATP6V0E1P1	1.7071	0.0336461	0.227233	-3.90595
CST4	1.70703	0.000242693	0.0169041	0.355354
AC015660.1	1.70673	0.00279424	0.0594323	-1.79899
RPL13AP17	1.7054	0.0104606	0.12146	-2.93313
AC007182.1	1.70519	0.0118601	0.130373	-3.03936
AC104046.1	1.70505	0.00440492	0.0768504	-2.1932
SNORA22	1.70425	0.0283744	0.207363	-3.76653
LINC01559	1.70384	0.000637516	0.028094	-0.502408
AL357033.2	1.70349	0.0386087	0.245123	-4.01774
AC087761.1	1.70293	0.0189811	0.169057	-3.43395
EIF3KP2	1.70244	0.0138019	0.141676	-3.16717
PRR25	1.70222	0.0127805	0.135751	-3.10243
AC069431.2	1.6993	0.0160217	0.153531	-3.29236
COX5BP3	1.69917	0.0110683	0.125561	-2.98095
OR13Z2P	1.69913	0.0131669	0.138291	-3.12753
AC090589.2	1.69912	0.0433795	0.257369	-4.11184
GJA9	1.69844	0.00669822	0.0956333	-2.55343
MIR544B	1.69841	0.0422832	0.257098	-4.09122
MIR4795	1.69833	0.0451347	0.262005	-4.14375
FGF3	1.69778	0.0418563	0.255902	-4.08303
AC130462.3	1.69731	0.00834773	0.107161	-2.74143
AC022080.3	1.69698	0.0144785	0.145716	-3.2074
SNRPCP19	1.69581	0.040116	0.249631	-4.04873
AC020891.1	1.69552	0.0200853	0.17426	-3.48101
CHCHD2P11	1.69465	0.0269153	0.20196	-3.72315
AL445669.2	1.69408	0.0357244	0.234466	-3.95474
LINC02577	1.69396	0.000698213	0.0296833	-0.582813
TLX1	1.69292	9.64e-06	0.00293592	3.25749
SNORD19	1.69251	0.0288904	0.209423	-3.78133
PTPN2P1	1.69242	0.0165751	0.156427	-3.32078
AL022165.1	1.69238	0.025783	0.197268	-3.68775
RPAP2P1	1.69218	0.0048565	0.0807953	-2.27734
RPL17P11	1.6921	0.012996	0.137024	-3.11652
PITX1	1.69188	1.98e-05	0.0043569	2.60808
BCORP1	1.69171	0.0191206	0.169592	-3.44005
OPA1-AS1	1.69111	0.018218	0.165576	-3.39974
MIR6871	1.69045	0.0255792	0.196122	-3.68121
ERHP1	1.68882	0.0440002	0.258406	-4.12328
AC005520.2	1.68866	0.0391002	0.246748	-4.02799
AC004849.1	1.68813	0.049411	0.275158	-4.21632
AC009093.3	1.68726	0.000522558	0.0258282	-0.326371
RP11-298C2.1	1.6871	0.0277161	0.204997	-3.74725
IGHE	1.68698	0.0163872	0.155529	-3.31124
AC244157.2	1.68695	0.0353102	0.233012	-3.94525
AC113386.1	1.6866	0.0214969	0.181049	-3.53742
AL109983.1	1.6863	0.0266862	0.201016	-3.71611
KRT17P2	1.68403	0.011251	0.126851	-2.9948
AC012512.1	1.68389	0.00342332	0.0661995	-1.97521
CYCSP32	1.68374	0.000721099	0.0299842	-0.611312
RPL23AP77	1.68318	0.0307378	0.216364	-3.83211
AKR1B10P1	1.68269	0.0422026	0.256895	-4.08968
MIR1273H	1.68203	0.0122484	0.132924	-3.06656
AL731556.2	1.68187	0.015332	0.150037	-3.25548
MTND5P1	1.6817	0.00719999	0.0994724	-2.61521
AL513485.1	1.68021	0.0220696	0.183134	-3.55922
AC078788.1	1.67944	0.0282651	0.206928	-3.76337
AL031905.1	1.67897	0.00336589	0.0655101	-1.96055
H2AC21	1.67834	0.0367852	0.238639	-3.97851
AL356292.1	1.67778	0.0443256	0.25951	-4.12921
MOG	1.67759	0.0122395	0.132907	-3.06595
KRT8P34	1.67742	0.00959939	0.115331	-2.86025
KRT18P26	1.67731	0.00663176	0.0952595	-2.54489
AL049836.1	1.67641	0.000394389	0.0223456	-0.0767251
LINC01897	1.67617	0.0437821	0.257836	-4.11928
ZPBP2	1.67601	0.0127983	0.13586	-3.1036
AC087752.1	1.6747	0.0288205	0.209139	-3.77934
AC091804.1	1.67424	0.0220215	0.183103	-3.55741
AC007849.2	1.67393	0.0269146	0.20196	-3.72312
HMGN1P8	1.67347	0.0219483	0.18271	-3.55465
RPL35AP15	1.67302	0.00935304	0.113918	-2.83817
RN7SL116P	1.67254	0.010902	0.124593	-2.96814
PSCA	1.67242	0.0027978	0.0594732	-1.8001
AL031005.1	1.67006	0.0022629	0.0535206	-1.61539
NXF3	1.66958	0.00010682	0.0109779	1.08899
TPM3P7	1.6693	0.0228022	0.186218	-3.58627
LARS2-AS1	1.66909	0.0220514	0.183134	-3.55854
SNORA3B	1.66886	0.00248408	0.0560495	-1.69664
IL17C	1.6681	0.0019391	0.049633	-1.48062
AC104695.4	1.66802	0.000215431	0.015943	0.461631
AL451044.1	1.66725	0.0189612	0.169003	-3.43307
RNU1-106P	1.66718	0.000712147	0.0298379	-0.600275
AC011491.2	1.66709	0.0364118	0.237157	-3.97022
TRAJ34	1.66602	0.0494221	0.275162	-4.2165
SPINK7	1.66572	0.0191559	0.169656	-3.44158
COL17A1	1.66571	7.99e-05	0.00954876	1.34925
OR7E91P	1.66555	0.00504787	0.0826802	-2.31061
PLAAT2	1.66509	0.000140613	0.0127841	0.842843
CCDC166	1.66494	0.0136266	0.140761	-3.15642
MTOR-AS1	1.66478	0.0115246	0.128159	-3.01512
AL355132.1	1.66364	0.0206386	0.177074	-3.50359
RBP3	1.66353	0.00408701	0.0732755	-2.12853
KLK4	1.66298	0.00124945	0.0397518	-1.09557
AC140479.1	1.66281	0.0176373	0.16233	-3.3727
PPIAL4C	1.66281	0.028181	0.206697	-3.76092
Z85994.1	1.66268	0.0405332	0.250936	-4.0571
SPRR4	1.6626	0.00581106	0.0889405	-2.43164
PPIAP52	1.6622	0.0295545	0.2119	-3.79996
RN7SL154P	1.66194	0.0478398	0.270389	-4.19046
KB-1674E1.1	1.66185	0.0025472	0.0568455	-1.71848
AC108925.1	1.66157	0.0296844	0.212408	-3.80356
AC020907.5	1.66149	0.00246159	0.0559315	-1.68872
AC113174.1	1.66142	0.00367798	0.0689611	-2.03734
AC004461.2	1.66088	0.0221233	0.183268	-3.56124
AC012368.2	1.66068	0.00615983	0.0919458	-2.48164
AC139103.1	1.6603	0.0214444	0.180733	-3.53539
AC007450.4	1.65775	0.0236028	0.188118	-3.61482
AC096552.1	1.65726	0.0279577	0.205895	-3.75438
AL512785.2	1.65722	0.0161545	0.154237	-3.29927
SNORA2C	1.65614	0.0260394	0.198255	-3.69591
INSL6	1.65601	0.0231592	0.186983	-3.59913
XXbac-BPG154L12.5	1.65589	0.0291454	0.210375	-3.78853
FRGCA	1.65504	0.0370457	0.239644	-3.98424
SLC26A9	1.65418	0.000136366	0.0125678	0.870288
AC074091.1	1.65366	0.0453598	0.26264	-4.14775
AC139720.1	1.65167	0.000696347	0.0296317	-0.580448
AC006449.3	1.65107	0.0163333	0.155179	-3.30848
AL450992.2	1.6504	0.000251043	0.0173086	0.325202
PPIAP79	1.65022	0.00873558	0.109527	-2.78009
KRT16	1.6486	0.00475346	0.0798163	-2.25886
AL079303.1	1.64785	0.0256617	0.196502	-3.68387
AL591178.1	1.64748	0.0273129	0.203457	-3.73521
RNU4-25P	1.64673	0.0466776	0.26667	-4.17074
AP003119.1	1.64644	0.039366	0.247516	-4.03347
AC016821.2	1.64504	0.0261908	0.198935	-3.70068
WDR72	1.64445	0.000701657	0.0296833	-0.587162
OOEP	1.64331	0.00858906	0.10852	-2.7657
AC091179.1	1.64189	0.0373255	0.240779	-3.99034
LDHAP1	1.64157	0.00410973	0.0735135	-2.13332
AC022498.2	1.64092	0.00936427	0.113953	-2.83919
AC068228.2	1.64024	0.0307247	0.216328	-3.83176
KRT4	1.64	0.00377238	0.0698653	-2.05927
WI2-2373I1.1	1.63887	0.0190535	0.169216	-3.43712
ACTG1P15	1.63762	0.000919197	0.0344813	-0.82549
HOXB8	1.63672	5.12e-07	0.000648678	5.92741
AC005632.4	1.63663	0.0348658	0.231256	-3.93495
TRAV9-2	1.63593	0.0156994	0.151831	-3.27533
NTF4	1.63588	0.00111806	0.0377547	-0.997914
FAM96AP2	1.63506	0.00614795	0.0918953	-2.47999
GABRP	1.63432	0.000650202	0.0285109	-0.519834
AC011375.1	1.63387	0.048892	0.273948	-4.20788
SNORD13P3	1.63372	0.0194088	0.170998	-3.4525
PRSS51	1.63368	5.96e-05	0.00809322	1.61305
AL139246.4	1.6327	0.0159637	0.153326	-3.28932
SEC13P1	1.63245	0.0126023	0.134804	-3.09059
SLC7A5P1	1.63231	0.000988125	0.0357616	-0.889193
GUCY1B2	1.63198	2.48e-05	0.00496023	2.40273
AL031737.1	1.63182	0.00651659	0.0944255	-2.52989
PDSS1P1	1.63142	0.0223872	0.184291	-3.57106
AC106900.6	1.63142	0.029504	0.211723	-3.79856
AC132825.1	1.63126	0.0327498	0.224023	-3.88392
AC007000.4	1.63098	0.0112598	0.126903	-2.99546
AP001542.1	1.6306	0.00792583	0.104276	-2.69722
AC005476.1	1.63012	0.042384	0.257369	-4.09314
LINC01169	1.62997	0.043817	0.257935	-4.11992
LINC01705	1.62921	0.0045763	0.0781351	-2.22612
AC104964.1	1.62916	7.73e-06	0.00266509	3.45738
CPHL1P	1.62821	0.000124487	0.0119352	0.951875
AL589182.2	1.62817	0.0235787	0.187953	-3.61398
AC020914.3	1.62807	0.00412632	0.0736757	-2.1368
AC007314.1	1.62711	0.0379387	0.242882	-4.00356
ETF1P2	1.62661	0.00761261	0.102399	-2.66281
AC008739.3	1.62638	0.0113944	0.127494	-3.00551
PIK3C2G	1.62588	0.00199925	0.0504015	-1.5073
RPS12P5	1.62574	0.0050882	0.0830452	-2.31746
WFDC10B	1.62545	0.0011997	0.0389771	-1.05987
RPL7P52	1.6249	0.0274447	0.203909	-3.73916
OR2H2	1.62489	0.0151845	0.149433	-3.24737
AC092598.1	1.62426	0.013396	0.139513	-3.14206
SPDYE17	1.624	0.0102149	0.119834	-2.91299
MUC2	1.62371	0.0136775	0.141016	-3.15956
AL606490.9	1.62359	0.0286783	0.208579	-3.77528
AC083801.2	1.62324	0.0338923	0.228101	-3.91189
LINC02314	1.62318	0.0114192	0.127655	-3.00735
ZNF114-AS1	1.6224	0.0389643	0.246265	-4.02517
AC121758.2	1.62198	0.0064738	0.0941245	-2.52425
AC040975.1	1.62187	0.0233605	0.187448	-3.60629
TPSP2	1.62158	0.0171778	0.159802	-3.35065
AC021218.1	1.62005	0.000716046	0.0298863	-0.605099
CYP2C19	1.61977	0.00686876	0.0969523	-2.57494
KRT18P16	1.61956	0.0113106	0.127241	-2.99927
IGKV1-12	1.61733	0.0479566	0.270824	-4.19241
TRAV22	1.61688	0.0421405	0.256733	-4.08849
CST11	1.61645	0.00980364	0.116795	-2.87813
AC000120.1	1.61636	0.0249267	0.193075	-3.6599
LINC00443	1.61571	0.0281621	0.206669	-3.76037
SFTA2	1.61565	0.00190022	0.0492864	-1.46292
CASC19	1.61549	0.0124748	0.134072	-3.08201
RPL17P40	1.61494	0.0203761	0.175771	-3.49296
AC103702.1	1.61391	0.00285698	0.0599668	-1.81829
TRIM29	1.61373	0.000460921	0.0241776	-0.215098
PRAL	1.61318	7.08e-05	0.00890283	1.45836
KRT8P40	1.61237	0.0353119	0.233012	-3.94529
AC005046.1	1.61203	0.0434723	0.257369	-4.11356
AL356488.2	1.6115	0.0355408	0.233885	-3.95055
AC007336.3	1.61068	0.0122473	0.132924	-3.06649
GOLGA6B	1.61043	0.00184052	0.0485028	-1.43502
BZW1-AS1	1.61016	0.0313671	0.218576	-3.84869
MT-TW	1.61003	0.00634601	0.0934202	-2.50717
AL049647.1	1.60989	0.013101	0.13779	-3.1233
TRBJ2-3	1.60975	0.0490029	0.274203	-4.20969
LINC02672	1.60969	0.0349492	0.231527	-3.9369
AL024497.2	1.60937	0.0213635	0.180462	-3.53226
RPL31P58	1.60889	0.0459176	0.264325	-4.15757
UBXN7-AS1	1.6082	0.0495211	0.275277	-4.2181
MIR1205	1.60811	0.0108817	0.124566	-2.96656
AC104978.1	1.60785	0.0119277	0.130772	-3.04416
RPL21P111	1.60758	0.0306954	0.21615	-3.83098
SLC25A15P5	1.60753	0.0340361	0.228598	-3.91534
AKR7A2P1	1.60745	0.00481538	0.0803567	-2.27001
MIR1293	1.60656	0.0218399	0.182456	-3.55055
ITLN1	1.6064	0.0159099	0.153025	-3.28649
SLC6A14	1.60593	0.00291152	0.0606675	-1.83472
ANAPC10P1	1.6049	0.0341498	0.229101	-3.91806
AC022336.4	1.6046	0.00128076	0.0403472	-1.11731
AC067742.1	1.60397	0.0189827	0.169057	-3.43402
RN7SL145P	1.60393	0.0151463	0.149292	-3.24526
AC007570.1	1.6033	0.00595711	0.0901311	-2.45294
AADACL4	1.6029	0.0100385	0.118571	-2.89821
UGT1A2P	1.60251	0.0141303	0.143672	-3.18695
AC005912.2	1.60233	0.0111653	0.126173	-2.98834
RNF223	1.60095	0.000127135	0.0120222	0.933025
AF131215.2	1.60038	0.019281	0.170515	-3.447
INGX	1.60036	0.0177334	0.162854	-3.37724
AC074286.1	1.59997	0.0329879	0.224795	-3.88984
AC016687.1	1.59981	0.0209497	0.17849	-3.51602
MIR3143	1.59946	0.0193768	0.170922	-3.45113
AC020658.5	1.59913	0.0054249	0.0854209	-2.37257
AL353692.2	1.59701	0.0315217	0.219108	-3.85271
AC011611.3	1.59642	0.00486678	0.0809169	-2.27916
AL138689.1	1.59589	0.000315243	0.0196718	0.122406
AC090151.1	1.59555	0.0048744	0.0810188	-2.28051
AC120349.3	1.5955	0.0423989	0.257369	-4.09342
AL121906.1	1.59524	0.0411161	0.253166	-4.06863
ILF2P1	1.59449	0.0202403	0.175023	-3.4874
AC090505.1	1.5942	0.00332554	0.0649696	-1.95009
OVCH2	1.594	0.0221072	0.183268	-3.56063
TMPRSS15	1.59286	0.0494986	0.275277	-4.21774
LINC02157	1.5927	0.0474437	0.269016	-4.18379
HNRNPA1P56	1.59237	0.0160592	0.15379	-3.29432
PA2G4P6	1.59177	0.00174436	0.0474684	-1.38809
SUB1P1	1.59175	0.0160955	0.153941	-3.29621
AC007450.3	1.59122	0.0040356	0.0727128	-2.11759
RPS26P38	1.59117	0.0498618	0.276061	-4.22358
AC011753.2	1.59013	0.0204085	0.175864	-3.49428
NCAPGP1	1.58998	0.0163655	0.155404	-3.31013
LINC02515	1.58959	0.0274233	0.203861	-3.73852
AKR1C8P	1.58914	0.0116663	0.129234	-3.02544
AC019109.1	1.58886	0.0180128	0.164535	-3.39029
FARP1-AS1	1.58844	0.0291261	0.210346	-3.78799
KRT6C	1.58801	0.010948	0.124791	-2.9717
DYNLL1P7	1.5865	0.0162931	0.154878	-3.30642
AC010519.1	1.58636	0.00258261	0.0571245	-1.7305
PRKCA-AS1	1.58634	0.0103693	0.120939	-2.92571
OBP2B	1.58581	0.0231832	0.186983	-3.59999
SLC34A1	1.58442	0.00326663	0.0645131	-1.9346
HSFY3P	1.58439	0.00920564	0.112821	-2.82467
KRT6B	1.58433	0.00355054	0.0674776	-2.00682
RAD17P1	1.58229	0.00837368	0.107391	-2.74407
AC026369.3	1.58	0.0127546	0.135715	-3.10072
MIR7849	1.57979	0.0283778	0.207363	-3.76663
AC006116.6	1.57951	0.0419348	0.256139	-4.08454
AC025539.1	1.57947	0.000312911	0.0196387	0.129014
RNU6-1223P	1.57902	0.0466177	0.266529	-4.16971
CEACAM6	1.57814	0.00059747	0.027239	-0.445009
AL078645.1	1.57809	0.0438932	0.258183	-4.12132
AC107926.1	1.57805	0.0438859	0.258183	-4.12119
KLK7	1.57769	0.00614703	0.0918953	-2.47986
ARSH	1.57722	0.000928787	0.0346812	-0.834637
AL158212.4	1.57721	0.0216439	0.181732	-3.54307
NUDT19P3	1.57716	0.0259569	0.19803	-3.69329
ONECUT3	1.57714	0.00583476	0.0891698	-2.43513
MIR34A	1.57695	0.0320171	0.221168	-3.86545
ACTBP9	1.57633	0.000965042	0.0353015	-0.868374
COX6B1P3	1.57631	0.0157205	0.151975	-3.27646
LINC00505	1.57599	0.0499988	0.276397	-4.22578
LINC01713	1.57552	0.0491208	0.27444	-4.21161
TRAV8-6	1.57544	0.0111619	0.12616	-2.98807
TMPRSS11CP	1.57503	0.0243768	0.190987	-3.64149
AL117692.1	1.57342	0.0229013	0.186567	-3.58986
LINC01944	1.57325	0.036414	0.237157	-3.97027
ABHD15-AS1	1.57253	0.0213371	0.18041	-3.53123
AC011476.2	1.57197	0.00135848	0.0414979	-1.16903
LINC00939	1.57107	0.000241402	0.0168789	0.36011
SETP12	1.57082	0.0182044	0.16552	-3.39912
GTF2A1L	1.57058	0.0232093	0.187034	-3.60092
RPL36AP26	1.57045	0.0410406	0.252902	-4.06715
TMSB4Y	1.57004	0.0349073	0.231403	-3.93592
AC002984.1	1.5696	0.0455686	0.263225	-4.15144
TXNP4	1.5696	0.0285155	0.207855	-3.77061
AL606748.2	1.56951	0.0331797	0.225565	-3.89457
AC006237.1	1.56878	0.00034222	0.020574	0.0493694
AC023389.3	1.56854	0.0306334	0.215928	-3.82933
KLK10	1.56831	0.000996086	0.0359216	-0.896259
AC022405.1	1.56781	0.0249836	0.193352	-3.66178
MIR572	1.56779	0.0160685	0.153794	-3.2948
CARD11-AS1	1.56774	0.00656035	0.0946567	-2.53562
OR7E4P	1.56767	0.00276358	0.0590533	-1.7894
AC027702.1	1.56687	0.0345901	0.230675	-3.92849
AC011363.1	1.56645	0.0334207	0.226342	-3.90047
LINC02257	1.5662	0.00189911	0.0492822	-1.46241
AC087612.1	1.56598	0.0151676	0.149358	-3.24644
AC135586.1	1.56566	0.0437188	0.257603	-4.11812
RNA5SP278	1.56563	0.0277674	0.205131	-3.74877
AP001120.2	1.56546	0.0230073	0.186759	-3.59368
GAPDHP42	1.56537	0.01841	0.16635	-3.40848
RAET1L	1.56517	0.0023405	0.0545964	-1.64478
AC137770.1	1.56509	0.0336513	0.22724	-3.90607
LGALS9B	1.56462	0.000888284	0.0338553	-0.795337
IL36G	1.56308	0.0189546	0.168972	-3.43278
AC100823.2	1.56297	0.00883054	0.11014	-2.78929
FXYD4	1.56255	0.0257429	0.197017	-3.68647
AC121338.1	1.56251	0.0104166	0.121181	-2.92956
EFNA2	1.56238	1.61e-05	0.00386832	2.79191
AC095050.1	1.56141	0.0238575	0.189152	-3.6237
PHBP21	1.56104	0.0283508	0.207304	-3.76585
SMCR2	1.56035	0.0145713	0.146186	-3.21277
AC114402.2	1.56021	0.0431976	0.257369	-4.10846
AC009229.2	1.56008	0.0430249	0.257369	-4.10523
KRT74	1.55969	0.00637163	0.0936202	-2.51062
AC084783.1	1.55953	0.0391342	0.24688	-4.02869
AC145146.1	1.55941	0.0429437	0.257369	-4.10371
C17orf77	1.55926	0.0271618	0.202968	-3.73064
AC068831.1	1.55919	0.0190902	0.169374	-3.43872
HOXC6	1.55908	3.49e-14	9.5e-10	21.0854
TUBB8	1.55846	0.000661763	0.0287028	-0.535418
PHGR1	1.55815	0.00399345	0.0723835	-2.10852
AC006994.1	1.55779	0.030341	0.21496	-3.82148
OR7E39P	1.55735	0.0235297	0.187869	-3.61226
UTF1	1.55707	0.0340925	0.228857	-3.91669
SETP5	1.55685	0.0474918	0.269204	-4.18461
KDELC1P1	1.55681	0.0213044	0.180299	-3.52996
HLA-T	1.55678	0.0288578	0.209257	-3.7804
MIR4698	1.55485	0.0154948	0.150628	-3.26433
LINC01546	1.55358	0.0363046	0.23662	-3.96783
GPA33	1.55325	7.63e-06	0.00265034	3.46969
PPP1R14BP2	1.55324	0.0236811	0.188415	-3.61756
AC073150.1	1.55319	0.0240004	0.189516	-3.62863
AC091814.1	1.55313	0.0293816	0.211339	-3.79515
ENOX1-AS1	1.5529	0.00571446	0.0880533	-2.41725
MIR26B	1.55258	0.0465758	0.266431	-4.16899
UBE2HP1	1.55159	0.0486398	0.273194	-4.20374
AL590103.1	1.55158	0.00855383	0.108326	-2.7622
AL513343.1	1.55114	0.0339194	0.228146	-3.91254
AC004009.2	1.55079	0.0446638	0.26041	-4.13532
FABP2	1.55039	0.0338068	0.227861	-3.90983
AL928768.3	1.55028	0.0351281	0.232317	-3.94105
TRBV4-1	1.5497	0.0214876	0.181007	-3.53706
FLRT1	1.54968	0.0386141	0.245123	-4.01786
KRT18P57	1.54961	0.0182492	0.165686	-3.40117
MTCO1P3	1.5494	0.0458258	0.264047	-4.15596
TMEM238L	1.54938	0.00447923	0.0773022	-2.20763
AC026782.2	1.54903	0.0431688	0.257369	-4.10792
GPR25	1.54877	0.0067468	0.0959992	-2.55961
AL589743.6	1.54818	0.00300946	0.0616702	-1.86345
AC106729.1	1.54794	0.0121983	0.132618	-3.0631
AC005841.1	1.54768	0.0154779	0.150518	-3.26342
RP11-229P13.19	1.54568	0.0156583	0.151487	-3.27313
C2-AS1	1.54548	0.0174669	0.161264	-3.3646
AC010335.1	1.54544	0.0378951	0.242776	-4.00263
AC036103.1	1.54466	0.00169906	0.0469291	-1.36506
AC092170.1	1.54334	0.0223408	0.184073	-3.56935
KRT18P29	1.54317	0.0265098	0.200435	-3.71065
AC010542.1	1.54101	0.0412837	0.253854	-4.07192
PSMD10P2	1.54098	0.00154549	0.0444924	-1.28211
MIR4507	1.54091	0.032502	0.223069	-3.87773
AP000844.1	1.54051	0.011321	0.127277	-3.00005
ALDH3B2	1.54031	0.000259992	0.0176113	0.293985
PHBP8	1.53965	0.0281975	0.206697	-3.7614
BLACAT1	1.53951	0.000106434	0.0109589	1.09223
AC007278.1	1.53949	0.0166815	0.15709	-3.32614
HNRNPA1P50	1.53914	0.0138168	0.141702	-3.16808
LINC02721	1.53909	0.0417333	0.255494	-4.08066
AC007283.2	1.53903	0.00253107	0.056617	-1.71295
AL355312.4	1.53882	0.00122545	0.0393159	-1.07853
TRAV12-2	1.53862	0.00711152	0.0989147	-2.60465
COL11A1	1.53837	0.00132488	0.0408933	-1.14704
AC090971.3	1.53801	0.0450653	0.261714	-4.14252
AC104852.1	1.53775	0.0257492	0.197037	-3.68667
AC008147.4	1.53773	0.018564	0.167076	-3.41543
AC105254.1	1.53681	0.0291505	0.210384	-3.78868
AC007875.3	1.53648	0.04089	0.252459	-4.06418
TMPRSS4	1.53638	7.16e-05	0.00897092	1.44738
AC015688.4	1.536	0.0330413	0.224944	-3.89116
AL358334.3	1.53584	0.046479	0.266122	-4.16732
LINC01857	1.53568	0.00404077	0.0727379	-2.1187
AC144536.1	1.53549	0.0074916	0.101594	-2.64913
AC009743.1	1.53514	0.0387071	0.245384	-4.0198
COX6CP1	1.53484	0.0228037	0.186218	-3.58633
Z73429.1	1.53399	0.0248953	0.193024	-3.65886
LINC00536	1.53379	0.0140033	0.14286	-3.17936
KLF4P1	1.53373	0.00643766	0.0938727	-2.51945
SPINK4	1.53322	0.034255	0.229524	-3.92056
LINC00298	1.53247	0.0169286	0.158376	-3.33843
TMEM89	1.53173	0.0297046	0.212497	-3.80411
AMMECR1-IT1	1.53115	0.0149344	0.14814	-3.23344
GAL3ST2	1.53006	0.0169971	0.158799	-3.34181
AC113208.3	1.5294	0.0169472	0.158523	-3.33935
GJB5	1.52876	0.00049549	0.0250588	-0.279231
RP11-445P19.3	1.52868	0.0424995	0.257369	-4.09533
AC069294.1	1.52826	0.00997939	0.118062	-2.8932
LINC00524	1.52781	0.00219065	0.0526799	-1.58709
AC091179.4	1.5267	0.0260365	0.198255	-3.69582
ENPP7P11	1.52665	0.00125251	0.0397788	-1.09772
SLC25A24P1	1.52656	0.0148144	0.147462	-3.22667
AL121601.2	1.52608	0.0358174	0.234737	-3.95685
RN7SL225P	1.52424	0.0331795	0.225565	-3.89456
PCED1CP	1.52356	0.00698222	0.0979165	-2.58896
RPL9P28	1.52341	0.0152472	0.149734	-3.25083
GMCL1P2	1.52305	0.0493599	0.275091	-4.2155
AC146507.2	1.52208	0.0360804	0.235836	-3.9628
AP005403.1	1.52073	0.0151065	0.149062	-3.24305
MIR196A2	1.51974	0.000535599	0.0260987	-0.348212
LIPM	1.51916	2.05e-05	0.0043952	2.57643
AF131215.4	1.51874	0.00712696	0.0990031	-2.6065
AC040174.2	1.51814	0.0398102	0.248897	-4.04255
RPL6P30	1.51753	0.0334228	0.226342	-3.90052
AC006057.1	1.51702	0.0357116	0.234439	-3.95445
HMGB1P51	1.51695	0.0489689	0.274109	-4.20913
AC073575.2	1.51658	0.0026324	0.0575831	-1.74711
AC096720.1	1.51632	0.0442279	0.2592	-4.12743
FGFBP1	1.51583	0.00797755	0.104628	-2.70276
RNF138P1	1.51558	0.0389641	0.246265	-4.02516
AC003965.2	1.51556	0.000292656	0.0188255	0.188578
TVP23CP1	1.51533	0.028473	0.207724	-3.76938
LRRC3-DT	1.51516	0.041011	0.252852	-4.06656
KRT20	1.51511	0.033383	0.226248	-3.89955
AC092332.1	1.5149	0.0286018	0.208245	-3.77309
UNC93B3	1.51357	0.0256179	0.196283	-3.68246
AC079313.1	1.51326	0.0224238	0.184291	-3.57242
AP003717.1	1.51315	0.018641	0.167437	-3.41888
ARNTL2-AS1	1.5127	0.0407459	0.251855	-4.06132
AC011506.1	1.51269	0.0380381	0.243176	-4.00568
AL360093.1	1.51267	0.0155189	0.150737	-3.26564
AC109631.1	1.5121	0.0380614	0.243296	-4.00618
AC130456.1	1.51183	0.0238041	0.188948	-3.62184
AL109758.1	1.51134	0.0436197	0.257444	-4.11629
LOR	1.50962	0.0394483	0.247669	-4.03516
AC009041.1	1.50946	0.00260452	0.0572259	-1.73785
AC010533.1	1.50806	0.00288706	0.0603424	-1.82739
RPS20P4	1.5074	0.029662	0.212303	-3.80294
LINC02450	1.50728	0.0110993	0.125816	-2.98332
AC092570.1	1.50611	0.0229762	0.186759	-3.59257
AC004080.4	1.50592	0.0291963	0.210631	-3.78996
RN7SL473P	1.50565	0.0212806	0.180182	-3.52903
AC007785.1	1.50551	0.0254024	0.195343	-3.67549
AC010735.1	1.50495	0.0301472	0.214111	-3.81623
AC016245.1	1.50363	0.0134958	0.139998	-3.1483
TUBAL3	1.50316	0.000549103	0.026421	-0.370268
UGT1A9	1.50303	0.0213689	0.180462	-3.53247
TFF2	1.50302	0.0186999	0.167607	-3.42151
MUC21	1.50285	0.0229113	0.186594	-3.59023
NDUFAF4P1	1.5027	0.0377852	0.242384	-4.00027
AC004893.1	1.50262	0.000382372	0.0218656	-0.049237
AL356276.1	1.5022	0.0292104	0.210677	-3.79036
TRBV11-2	1.50133	0.0188705	0.168664	-3.42908
CYP2AB1P	1.50126	0.0258205	0.197388	-3.68895
LINC01887	1.50105	0.0497282	0.275712	-4.22144
IGHV3-79	1.50054	0.00788724	0.104121	-2.69306
CTSE	1.50001	0.00101543	0.0360962	-0.913192
AC023813.3	1.4991	0.00503958	0.0826297	-2.3092
AC244100.3	1.49891	0.0379303	0.242882	-4.00338
MRPS18AP1	1.4988	0.00957994	0.115282	-2.85853
LINC01443	1.49832	0.0443702	0.259594	-4.13002
RPL21P7	1.4978	0.00193907	0.049633	-1.4806
PDZD3	1.49726	0.000353786	0.0209913	0.0198175
AC010789.1	1.49532	0.0413565	0.254159	-4.07334
SUPT4H1P2	1.49497	0.00751134	0.101748	-2.65138
AC141586.5	1.49428	9.23e-05	0.0102414	1.21987
AC004923.1	1.49347	0.000406565	0.0226661	-0.103729
TLX1NB	1.49268	0.0247115	0.192311	-3.65275
TBX4	1.49237	0.000109554	0.0111954	1.06634
DBET	1.49226	0.0267738	0.201397	-3.71881
LIPN	1.49038	0.0209225	0.178407	-3.51494
FER1L4	1.49008	1.16e-06	0.00088598	5.18346
RNU7-125P	1.48991	0.0280325	0.206167	-3.75658
HOXC4	1.48874	9.29e-26	5.06e-21	45.4152
AC090015.1	1.48813	0.0262449	0.199012	-3.70238
NXT1-AS1	1.48776	0.00554538	0.0864965	-2.39145
AC024475.1	1.48653	0.0391982	0.247149	-4.03001
HNRNPA1P26	1.48648	0.0282239	0.206842	-3.76217
RP11-291I6.2	1.48595	0.0419609	0.256139	-4.08505
AC006141.1	1.48546	0.0193787	0.170922	-3.45121
KRT71	1.48517	0.0246051	0.191871	-3.64919
HMGN2P36	1.48254	0.00923133	0.112992	-2.82704
NECTIN4	1.482	0.000202706	0.0152953	0.515966
H3C13	1.48198	0.0285039	0.207838	-3.77027
RNY4P6	1.48098	0.0472745	0.268531	-4.18093
KERA	1.48017	0.00208685	0.0514793	-1.54474
AC105021.1	1.47907	0.0381075	0.243499	-4.00716
NPIPB10P	1.47895	0.0270129	0.202385	-3.72612
WTAPP1	1.47826	0.000623476	0.0278128	-0.482709
AC091934.1	1.47815	0.0304513	0.215321	-3.82445
AL645608.1	1.4758	0.00490155	0.081346	-2.28529
AC034207.1	1.47575	0.040518	0.250908	-4.05679
AC092765.1	1.47543	0.0474898	0.269204	-4.18457
C9orf131	1.4739	0.00653452	0.0945094	-2.53224
RNU6-850P	1.4729	0.00662763	0.0952595	-2.54436
AC008870.5	1.47247	0.0112235	0.126594	-2.99273
AC069360.1	1.47244	0.00180347	0.0481156	-1.41724
KRT18P32	1.47218	0.00795005	0.104444	-2.69982
NDUFAB1P1	1.47145	0.0423473	0.257344	-4.09244
AC136475.3	1.47141	5.15e-05	0.00738464	1.74384
AC091117.3	1.47087	0.0435341	0.257369	-4.11471
AC130448.1	1.47056	0.0107183	0.12328	-2.95375
AC021713.1	1.4696	0.0383023	0.244057	-4.01129
MYCNOS	1.46857	0.0146967	0.146837	-3.21997
AC019163.1	1.46798	0.016475	0.15586	-3.31571
AC148477.4	1.46792	0.0438888	0.258183	-4.12124
AC093844.1	1.46784	0.0414882	0.254652	-4.0759
PLA2G3	1.46768	0.0440969	0.258711	-4.12505
AC008395.1	1.46679	0.0454928	0.263083	-4.1501
FGF20	1.46654	3.17e-06	0.00158195	4.26792
AC005351.1	1.46649	0.0296507	0.21225	-3.80262
AC243919.2	1.46632	0.011202	0.126463	-2.99111
AC107871.1	1.46595	0.032051	0.22129	-3.86632
FP325331.1	1.46537	0.00866052	0.108892	-2.77275
AC010359.1	1.46524	0.00771603	0.103085	-2.67433
PAX7	1.46349	0.0407264	0.251785	-4.06094
CLDN18	1.46331	0.0217487	0.182126	-3.54708
CTSL3P	1.46273	0.039064	0.246666	-4.02724
R3HDML	1.46272	0.0194913	0.171335	-3.45603
TYRO3P	1.46266	0.0117644	0.129871	-3.03252
AC079336.7	1.46239	0.0211928	0.179699	-3.5256
ROS1	1.46238	0.0028641	0.06007	-1.82045
FAM83A-AS1	1.46201	0.0239476	0.189356	-3.62681
LENEP	1.46125	0.0435016	0.257369	-4.11411
AC073167.1	1.46122	0.0264983	0.200394	-3.71029
AL359881.3	1.46106	0.0306648	0.215962	-3.83017
MIR580	1.46045	0.038736	0.245477	-4.02041
LCT-AS1	1.45976	0.0252027	0.194301	-3.66899
OR5BT1P	1.45948	0.036123	0.236002	-3.96375
MYO7B	1.45891	3.91e-06	0.00178787	4.07696
VGLL1	1.45808	0.00475369	0.0798163	-2.2589
OR10V2P	1.45773	0.042869	0.257369	-4.10231
AC107016.1	1.457	0.0230005	0.186759	-3.59344
TBC1D27P	1.45639	0.00540819	0.0853341	-2.36992
GJB6	1.45623	0.00199193	0.0503063	-1.5041
PTMAP3	1.45622	0.00271754	0.0585056	-1.7748
AC092868.2	1.4558	0.0016236	0.045726	-1.3253
AP003064.1	1.45513	0.00550871	0.0861714	-2.38575
LINC01833	1.45507	0.013921	0.142501	-3.1744
UNC93B6	1.45489	0.0421785	0.256805	-4.08922
OPN4	1.45468	0.0218736	0.182554	-3.55183
AP001574.1	1.45434	0.0434449	0.257369	-4.11306
MIR2909	1.45355	0.0280825	0.20634	-3.75804
OBP2A	1.45344	0.00210162	0.0516457	-1.55089
AP002812.1	1.45286	0.0129215	0.136768	-3.11168
AC022872.1	1.45262	0.0311889	0.218033	-3.84403
AC012363.1	1.45222	0.0152933	0.149765	-3.25336
AC018521.3	1.45214	0.0237177	0.188613	-3.61884
AC008985.1	1.45184	0.0105774	0.122339	-2.94254
AF064861.1	1.45145	0.0370569	0.239688	-3.98448
FAM83A	1.45095	0.00347145	0.0666254	-1.98731
KRT33B	1.45064	0.019043	0.169206	-3.43666
NUTM2F	1.45022	0.0284673	0.20771	-3.76922
OLFM4	1.44994	0.0157878	0.152285	-3.28004
CES5AP1	1.44912	0.0446129	0.260286	-4.1344
AL645939.2	1.4487	9.57e-05	0.0103393	1.18781
AC092145.1	1.44826	0.00200056	0.0504015	-1.50787
AC084117.1	1.44771	0.000606026	0.0274161	-0.457592
AL109741.2	1.44762	0.0178717	0.163795	-3.38372
CLEC19A	1.44752	0.0379911	0.242989	-4.00468
LINC01752	1.44735	0.00107321	0.0368341	-0.961903
MIR1972-2	1.44724	0.0474107	0.268937	-4.18324
AC008268.1	1.44701	0.0401225	0.249631	-4.04887
SPDYE19P	1.44599	0.0218012	0.18233	-3.54908
LINC02100	1.44553	0.0413412	0.254093	-4.07304
AC089984.2	1.44429	0.0294956	0.211711	-3.79833
MPRIP-AS1	1.44309	0.0268703	0.2019	-3.72177
OCSTAMP	1.44284	0.0243623	0.190931	-3.641
ARHGAP26-AS1	1.44274	0.0298451	0.213082	-3.80798
AL109659.3	1.44137	0.0191456	0.169656	-3.44114
AL136115.1	1.44114	0.020936	0.178411	-3.51548
AC027808.2	1.44035	0.00767825	0.10281	-2.67014
LEMD1	1.44015	0.000278327	0.018243	0.233278
AF001548.3	1.43998	0.0340371	0.228598	-3.91536
AC092810.3	1.43772	0.0474998	0.269221	-4.18474
AL138918.1	1.43761	0.0425203	0.257369	-4.09572
LINC02223	1.43723	0.0447857	0.260869	-4.13751
AC007431.2	1.43709	0.0170813	0.159303	-3.34594
NDUFB4P11	1.43703	0.0146649	0.146683	-3.21815
AC011473.4	1.43665	0.0436818	0.257506	-4.11743
PIN4P1	1.43635	0.00112792	0.0378939	-1.00564
AC012307.1	1.43612	0.0196881	0.172321	-3.4644
HOXA6	1.43585	0.00647118	0.0941181	-2.5239
AC106886.2	1.43577	0.000140825	0.0127841	0.841491
NPY4R2	1.4354	0.0171097	0.159441	-3.34733
IYD	1.43512	0.000286377	0.0186138	0.207889
AGRP	1.43501	0.000669969	0.0289848	-0.546315
MTCO1P15	1.43491	0.0308954	0.216969	-3.8363
AC084759.3	1.43438	0.0269093	0.20196	-3.72296
AC013268.3	1.43385	0.00840072	0.107487	-2.74682
SLCO1B3-SLCO1B7	1.43369	0.0365755	0.237732	-3.97387
AC007272.1	1.43219	0.00548353	0.0859255	-2.38181
AC118465.1	1.43195	0.0322016	0.221795	-3.87014
RNU7-140P	1.43188	0.0486785	0.273286	-4.20437
AP001858.2	1.43186	0.00231297	0.0543585	-1.63447
AC112206.1	1.43179	0.00655876	0.0946567	-2.53541
AP003168.1	1.43177	0.00600656	0.0906275	-2.46003
BTNL8	1.43137	0.00304716	0.0620882	-1.87426
LINC00922	1.43126	0.000889072	0.0338553	-0.796118
ATP1B1P1	1.43055	0.0176788	0.162586	-3.37467
ODAPH	1.42928	0.0213998	0.180558	-3.53366
LIMS1-AS1	1.42778	0.0180212	0.164559	-3.39068
DIRC1	1.42731	0.0184415	0.166404	-3.40991
AC079313.2	1.42662	0.0211938	0.179699	-3.52564
AP000962.2	1.42605	0.016478	0.15586	-3.31587
AP000654.1	1.4251	0.0410073	0.252852	-4.06649
AP001357.2	1.42453	0.0356002	0.234028	-3.95191
AC067930.4	1.42379	0.00107478	0.0368417	-0.963184
AL355001.1	1.42374	0.0412794	0.253854	-4.07183
AC019226.1	1.42301	0.00109363	0.0372068	-0.978488
MIR7111	1.42277	0.0285176	0.207855	-3.77067
LINC02595	1.42263	0.00564508	0.0875252	-2.40676
AL138759.1	1.42237	0.0492293	0.274658	-4.21338
AC131888.1	1.4222	0.000257547	0.0175283	0.302405
AC090877.1	1.42196	0.0201279	0.174397	-3.48277
AC092162.1	1.42091	0.00652761	0.0944596	-2.53134
AC016526.2	1.42065	0.00355429	0.0675018	-2.00773
DKK1	1.41834	0.00318456	0.0636025	-1.91253
RN7SL130P	1.41833	0.00329775	0.0647753	-1.94282
MUC16	1.41696	0.0103154	0.120623	-2.92129
AC079753.1	1.41692	0.0189359	0.168929	-3.43196
AP003168.2	1.41686	0.0376803	0.242053	-3.99802
AL157402.2	1.41667	0.0391419	0.246892	-4.02885
AL356276.2	1.41621	0.00854981	0.108325	-2.7618
GSTM3P2	1.41617	0.0391973	0.247149	-4.02999
AC013444.2	1.41536	0.0110018	0.125156	-2.97585
RNU6-1304P	1.41507	0.0071243	0.0989914	-2.60618
AC018659.1	1.41498	0.00581354	0.0889405	-2.432
LINC02562	1.41428	0.00649906	0.0942994	-2.52758
HMGB1P3	1.41371	0.00317353	0.0635377	-1.90952
C11orf44	1.41335	0.0245081	0.191522	-3.64592
IMPDH1P10	1.41327	0.0106798	0.123008	-2.9507
AC011352.1	1.41327	0.0157518	0.152122	-3.27813
AC016877.1	1.41275	0.0495749	0.275417	-4.21897
AC007342.8	1.41253	0.0424943	0.257369	-4.09523
AC068802.1	1.41127	0.0245784	0.191814	-3.64829
AL133243.4	1.4108	0.00303248	0.0619474	-1.87007
UNC5B-AS1	1.4105	3.74e-06	0.00176124	4.11622
AC138028.5	1.41034	0.00667101	0.0954443	-2.54994
FKSG56	1.4089	0.0343914	0.230127	-3.9238
AL359195.2	1.40822	0.0199135	0.173294	-3.47387
SCARNA6	1.40788	0.0148992	0.147967	-3.23146
AC128688.1	1.40642	0.0228404	0.186322	-3.58766
AL078587.1	1.40539	0.00538667	0.0851844	-2.36649
AP000787.2	1.40517	0.0323688	0.222478	-3.87437
TPRG1LP1	1.40492	0.025116	0.193908	-3.66614
ENPP7P14	1.40452	0.0440166	0.258407	-4.12358
MIR98	1.40434	0.0487059	0.273411	-4.20482
OR7E115P	1.40403	0.0329583	0.224739	-3.8891
CCDC194	1.40296	0.0250996	0.193876	-3.6656
PTMAP8	1.40273	0.0395294	0.247909	-4.03682
AC136469.2	1.40202	0.0467472	0.266844	-4.17194
MED4-AS1	1.40183	0.00982264	0.116954	-2.87977
LINC01081	1.40108	0.0436636	0.257506	-4.1171
LINC01644	1.40049	0.0348472	0.231221	-3.93452
RPL35P9	1.40011	0.0438343	0.257993	-4.12024
WNT2	1.39974	0.000641037	0.0281808	-0.507279
AL157384.1	1.39939	0.020505	0.176356	-3.4982
AC004241.4	1.3992	0.0201041	0.174368	-3.48179
AC080089.1	1.3986	0.0395531	0.247938	-4.0373
AL021154.1	1.39851	0.0286699	0.208579	-3.77504
PRAME	1.39818	0.0303737	0.215077	-3.82236
AP001893.2	1.39793	0.0225007	0.184601	-3.57525
LUNAR1	1.39792	0.00734215	0.100607	-2.63192
RNU6-907P	1.39745	0.0318119	0.220273	-3.8602
AC106801.1	1.39728	0.0308406	0.216695	-3.83484
AC106782.1	1.39612	1.77e-05	0.00406044	2.70531
AC087645.3	1.39543	0.0266236	0.200766	-3.71418
SYNPR-AS1	1.39451	0.0120547	0.131608	-3.05311
ALDOAP1	1.39406	0.0480343	0.271044	-4.19371
SRMS	1.39393	5.39e-06	0.00217587	3.78406
RNA5SP82	1.3927	0.00890103	0.110639	-2.79606
KRT18P3	1.3925	0.0409818	0.252832	-4.06599
AL691482.2	1.39177	0.0336857	0.227281	-3.90691
FMO7P	1.39151	0.0397467	0.248733	-4.04126
AC113410.2	1.39091	0.0137757	0.141493	-3.16558
AC027307.1	1.39059	0.0160775	0.153822	-3.29527
LINC01265	1.39008	0.0315569	0.219156	-3.85362
AC114296.1	1.39005	0.0203635	0.175722	-3.49244
AC104958.1	1.39004	0.0341859	0.229238	-3.91892
AC023794.6	1.38993	0.0275978	0.204461	-3.74374
ADGRF2	1.38989	0.00660988	0.0951194	-2.54206
TRIM15	1.3893	0.00145665	0.043112	-1.23022
AC010271.1	1.38912	0.00384977	0.0708263	-2.07684
LINC00501	1.38843	0.0025101	0.0563126	-1.70571
AC020893.2	1.38825	0.0492371	0.274658	-4.2135
PTGES3L-AARSD1	1.38793	0.00412711	0.0736757	-2.13696
AC073367.1	1.38706	0.0087492	0.109628	-2.78142
FOXN3-AS2	1.38706	0.0150989	0.149056	-3.24263
PPIAP1	1.3865	0.0154051	0.150278	-3.25947
SNORA77	1.38629	0.0346061	0.230675	-3.92887
MYL12BP2	1.38569	0.011143	0.125999	-2.98664
Z99289.2	1.38506	0.00312952	0.0629929	-1.89741
AL121652.1	1.38446	0.0425772	0.257369	-4.0968
LINC02195	1.38441	0.0225072	0.184621	-3.57549
AC112721.2	1.38423	0.0230233	0.186759	-3.59426
MT-TL1	1.38397	0.0104686	0.121501	-2.93378
AL139328.1	1.38386	0.022932	0.186604	-3.59097
AC023825.1	1.3837	0.0331299	0.225371	-3.89334
AC011242.1	1.38315	0.0335655	0.226942	-3.90399
LCN2	1.38288	0.00664189	0.0952595	-2.5462
LINC02718	1.38217	0.0175886	0.162058	-3.37039
MIA	1.38111	0.00100324	0.0359216	-0.902559
AL121987.1	1.37943	0.026665	0.200884	-3.71546
HOXD11	1.37888	0.0420421	0.256491	-4.0866
C7orf65	1.37875	0.028938	0.2096	-3.78268
AC025822.2	1.37721	0.0208221	0.177896	-3.51095
AC243773.1	1.37668	0.0387079	0.245384	-4.01982
C8orf31	1.37655	2.38e-07	0.000423298	6.62628
TRAV15	1.37569	0.00937565	0.114015	-2.84022
AC245052.7	1.37512	0.0458064	0.263964	-4.15562
OR51I1	1.37468	0.00740419	0.100982	-2.63911
TNS4	1.37405	0.00448127	0.0773022	-2.20803
AC115621.1	1.37328	0.017303	0.160255	-3.35672
APELA	1.37252	0.00928456	0.113369	-2.83193
AC091393.1	1.3724	0.00865643	0.108888	-2.77235
AL078621.1	1.37221	0.0275883	0.204461	-3.74345
TMEM40	1.371	0.00489983	0.0813423	-2.28499
AP006621.4	1.37071	0.00218943	0.0526799	-1.58661
AC010998.2	1.37017	0.0245843	0.191814	-3.64849
TKTL2	1.37005	0.0358014	0.234661	-3.95649
AL136115.2	1.36879	0.00643288	0.0938727	-2.51882
ST8SIA2	1.3677	0.000434099	0.0235738	-0.161901
AL160287.1	1.36758	0.0422564	0.256992	-4.0907
DRD5	1.36682	0.0324809	0.222958	-3.8772
AC004817.4	1.36631	0.0217279	0.182101	-3.54629
PSMD10P1	1.36569	0.00505789	0.0828053	-2.31232
AC138466.5	1.36546	0.0250433	0.193609	-3.66375
EEF1A1P41	1.36525	0.0194316	0.171048	-3.45348
AC093904.4	1.36502	0.00292645	0.0608156	-1.83916
RNU7-143P	1.36363	0.0483286	0.272135	-4.1986
AL590240.3	1.36337	0.0321766	0.221684	-3.86951
AL139246.2	1.36319	0.000584819	0.027037	-0.426066
AC139099.1	1.36232	0.0283484	0.207304	-3.76578
AC020612.3	1.36148	0.036631	0.237979	-3.9751
POLR3DP1	1.36121	0.0345168	0.230513	-3.92676
NBPF4	1.36073	0.0455088	0.263083	-4.15038
EGFR-AS1	1.36057	0.00683086	0.0966738	-2.57021
RNA5SP297	1.35959	0.0193029	0.170625	-3.44795
AL008627.1	1.35923	0.0110697	0.125561	-2.98106
ATP6V1G1P4	1.35919	0.0433596	0.257369	-4.11147
AC126120.1	1.35858	0.0407837	0.252055	-4.06207
AC020663.4	1.35832	0.0399113	0.248985	-4.0446
AP000311.1	1.35611	0.0154149	0.150278	-3.26
AC024592.2	1.35518	0.000912342	0.0344137	-0.818893
SMURF2P1	1.35514	0.0201227	0.174397	-3.48256
AL357153.1	1.35468	0.00557192	0.0867118	-2.39555
LRRC15	1.35456	0.000749417	0.0306912	-0.645335
KRT19P1	1.3539	0.00739721	0.100955	-2.6383
AC007608.4	1.35379	0.0189381	0.168929	-3.43206
AC007342.4	1.35375	0.027595	0.204461	-3.74365
AC008083.2	1.35355	0.0340787	0.228811	-3.91636
AL161644.1	1.35281	0.0426593	0.257369	-4.09835
KRT8P18	1.35266	0.0394067	0.247606	-4.0343
AL590666.3	1.35246	0.0255277	0.195893	-3.67955
AC011294.1	1.35164	0.0063658	0.0935598	-2.50983
SETP2	1.35164	0.025421	0.195395	-3.6761
AC093382.1	1.35124	0.0301812	0.214246	-3.81715
TFF1	1.35107	0.0220866	0.183194	-3.55986
AC012615.4	1.34987	0.0150943	0.149056	-3.24237
AC012366.1	1.34976	0.0196694	0.172271	-3.46361
GJB3	1.34894	0.000449503	0.0239565	-0.192845
AL135998.1	1.34854	0.0454863	0.263083	-4.14999
NMU	1.34817	0.00108853	0.0371258	-0.974371
RN7SKP57	1.34744	0.0368412	0.238837	-3.97975
NLRP3P1	1.34717	0.0331953	0.225587	-3.89495
KRTAP5-2	1.34617	0.0442725	0.259322	-4.12824
AL133215.3	1.34528	0.0334553	0.226478	-3.90131
THAP12P3	1.34515	0.0339895	0.228504	-3.91422
MIR320E	1.34468	0.0180245	0.164559	-3.39083
LINC01697	1.34345	0.00242776	0.0556382	-1.67667
LINC01133	1.34291	0.00229655	0.0540896	-1.62826
CYP2W1	1.3421	1.63e-05	0.00387468	2.78406
AP000577.2	1.34186	0.0295581	0.2119	-3.80006
RPL36AP48	1.34178	0.0421173	0.256718	-4.08805
AL450226.1	1.34176	0.040165	0.249824	-4.04972
RNU1-129P	1.34056	0.049071	0.274302	-4.2108
AMZ2P2	1.33981	0.0305607	0.215731	-3.82738
RSF1-IT2	1.33979	0.00511231	0.083081	-2.32153
RN7SL809P	1.33978	0.0434192	0.257369	-4.11258
AP002365.1	1.33964	0.0258404	0.197402	-3.68959
AL132656.3	1.33894	0.0411512	0.253316	-4.06932
H2AC7	1.33858	0.0359097	0.235145	-3.95894
AC012349.1	1.33795	0.0320411	0.221277	-3.86606
RP11-4G2.1	1.33793	0.0487517	0.273543	-4.20558
AC104031.1	1.33565	0.0301937	0.214289	-3.81749
CST1	1.33559	0.00709171	0.0987402	-2.60226
NECAP1P2	1.33505	0.0338234	0.227866	-3.91023
SP7	1.33477	0.0236261	0.188248	-3.61564
AC018695.6	1.33332	0.033205	0.225625	-3.89519
OR7E110P	1.33306	0.0224981	0.184601	-3.57516
DUSP5P1	1.33282	0.0143574	0.145033	-3.20035
WASIR2	1.33058	0.0126272	0.134942	-3.09225
NUTM1	1.32995	0.00347623	0.0666701	-1.9885
LRP1-AS	1.32929	0.0220859	0.183194	-3.55983
PCA3	1.32892	0.0341584	0.229131	-3.91826
SATB2-AS1	1.32668	0.000706539	0.0296943	-0.593289
MRPS15P1	1.32658	0.0494516	0.275215	-4.21698
MTATP8P2	1.32626	0.0312473	0.218202	-3.84556
PBOV1	1.32616	0.0338831	0.228072	-3.91167
ARL4AP5	1.32571	0.0332176	0.225682	-3.8955
AC011352.3	1.32533	0.0150921	0.149056	-3.24225
KRT18P15	1.32513	0.0154038	0.150278	-3.2594
RP11-932O9.10	1.32451	0.0010343	0.0362501	-0.929401
AL603825.1	1.32273	0.0218793	0.182554	-3.55205
KRT8P17	1.32256	0.02999	0.213556	-3.81195
AC097484.1	1.32234	0.0288423	0.209257	-3.77996
TEX44	1.32182	0.021593	0.181529	-3.54112
SORCS3	1.32161	0.0119891	0.13123	-3.0485
AP003419.2	1.31994	0.00692398	0.0974006	-2.58179
LINC02747	1.31939	0.0197738	0.172578	-3.46801
ACTBP8	1.31731	0.0281665	0.206669	-3.76049
HTR3E-AS1	1.31729	0.0207541	0.177518	-3.50823
DCAF13P3	1.31694	0.0365253	0.237576	-3.97275
AL160060.1	1.31684	0.023907	0.18933	-3.62541
AC016571.1	1.31666	0.000382992	0.0218656	-0.0506767
TAS2R30	1.31582	0.043056	0.257369	-4.10581
AC004022.2	1.31552	0.0116718	0.129234	-3.02584
LINC01097	1.31522	0.0299481	0.213427	-3.8108
AC046168.2	1.31474	0.00052127	0.0257964	-0.324185
RN7SKP179	1.31472	0.0223401	0.184073	-3.56932
AC007598.3	1.31472	0.0446536	0.26041	-4.13514
RPS29P7	1.31409	0.0274772	0.204036	-3.74014
RNA5SP97	1.31247	0.038421	0.244333	-4.01379
AC022080.4	1.31221	0.0311409	0.217934	-3.84277
AL136418.1	1.31034	0.0308942	0.216969	-3.83626
AC024560.1	1.31	0.0252185	0.194396	-3.6695
EQTN	1.30917	0.0161164	0.154032	-3.29729
OVOL1	1.30916	0.000261211	0.017618	0.289818
KRT8P35	1.30914	0.0126807	0.135324	-3.09582
AP003550.1	1.30872	0.0203911	0.175793	-3.49357
SHOX	1.30843	0.0261012	0.198503	-3.69786
PRAP1	1.30754	0.00235601	0.0547527	-1.65053
AC092032.1	1.30668	0.0362753	0.236541	-3.96717
CAPZA1P	1.30595	0.0142773	0.144707	-3.19565
AC133919.3	1.30588	0.0249799	0.19335	-3.66166
AC023302.1	1.30587	0.00462387	0.07841	-2.23504
AC079031.2	1.30525	0.0188436	0.168562	-3.42789
AC007099.1	1.30509	0.0392302	0.247163	-4.03067
CIDEC	1.30484	0.00310203	0.0626862	-1.88975
TBC1D3G	1.30454	0.00806601	0.105238	-2.71217
LINC01342	1.30392	0.00682982	0.0966738	-2.57008
KBTBD12	1.30362	0.00467832	0.0790626	-2.24513
NAALADL2-AS3	1.3025	0.0213878	0.180557	-3.5332
RN7SL144P	1.30249	0.0400804	0.249582	-4.04802
ANTXRLP1	1.30129	0.0448062	0.260905	-4.13788
RSPH10B2	1.29934	0.0208245	0.177896	-3.51104
SULT1C2	1.2993	0.00268672	0.058112	-1.76488
AC133749.1	1.29919	0.0200603	0.174101	-3.47998
RNU6-1196P	1.29884	0.0267679	0.201397	-3.71863
KRT78	1.2987	0.0139115	0.14248	-3.17383
NKX2-5	1.29803	0.0417879	0.255613	-4.08171
BCAS2P1	1.29759	0.000701919	0.0296833	-0.587492
AMN	1.29729	6.59e-06	0.00247403	3.6027
SERPINB2	1.29714	0.0151907	0.149433	-3.24772
AC073052.1	1.29614	0.000654239	0.0286313	-0.525308
AF228730.1	1.2948	0.020581	0.176787	-3.50127
LINC02043	1.29464	0.0403756	0.250371	-4.05395
AF124730.2	1.29438	0.0155918	0.151032	-3.26957
ADGRF1	1.29399	0.00235625	0.0547527	-1.65062
PRKG1-AS1	1.29395	0.00235136	0.0547527	-1.64881
AL023803.2	1.29387	0.00104101	0.0363005	-0.93509
AC092573.1	1.29334	0.0327593	0.224023	-3.88416
C12orf71	1.29279	0.0458883	0.264297	-4.15705
AC023794.1	1.29182	0.0244529	0.191305	-3.64406
PGBD4P7	1.29181	0.0333775	0.226248	-3.89941
AGR3	1.28749	0.00435238	0.076325	-2.18285
AC112173.1	1.28747	0.0452287	0.262264	-4.14542
AC022968.1	1.28733	0.0448868	0.261206	-4.13932
SIGLEC30P	1.28675	0.00210172	0.0516457	-1.55093
AC124283.4	1.28597	0.0186315	0.167435	-3.41845
STEAP2-AS1	1.28583	0.00286142	0.060037	-1.81964
UGT1A6	1.28564	0.0106695	0.122994	-2.94989
AP005432.1	1.28534	0.0101714	0.119606	-2.90937
AC005383.1	1.28496	0.00095999	0.0351727	-0.863751
KCP	1.28495	9.69e-06	0.00293592	3.2528
DEFB130C	1.28477	0.0384092	0.244287	-4.01354
AC092964.1	1.28458	0.0052277	0.0839205	-2.34073
AC010157.1	1.28403	0.00618555	0.0920144	-2.48522
KCNN4	1.28361	7.61e-06	0.00265034	3.47145
GSG1L	1.28356	0.00604137	0.0908759	-2.46499
RN7SL840P	1.28311	0.0318024	0.220243	-3.85995
AC073569.2	1.28282	0.000705889	0.0296899	-0.592476
MIR4635	1.28218	0.0207907	0.17772	-3.5097
SFN	1.28155	0.00116053	0.0384266	-1.0307
AC087385.1	1.28094	0.0372377	0.24043	-3.98843
ACTBP13	1.28017	0.0217797	0.182259	-3.54826
BIRC7	1.27953	0.00254755	0.0568455	-1.7186
MC5R	1.27791	0.0376218	0.241849	-3.99676
IL37	1.27783	0.0191865	0.169871	-3.44291
AC092099.1	1.27782	0.0300174	0.213632	-3.8127
AC108002.2	1.27723	0.0193178	0.170697	-3.44859
ADH7	1.27718	0.0315352	0.219117	-3.85306
LINC02739	1.2767	0.00164159	0.0460424	-1.33495
FOXH1	1.27637	9.28e-05	0.0102753	1.215
AC008464.1	1.27604	0.023324	0.187322	-3.605
PPIAP32	1.2759	0.0434623	0.257369	-4.11338
AC125611.2	1.27511	0.0326474	0.223762	-3.88137
AC008378.2	1.27464	0.0268977	0.201953	-3.72261
CLCA4	1.2736	0.00818909	0.106228	-2.72508
Z82185.1	1.27288	0.0118071	0.130053	-3.03558
TRAV8-2	1.27265	0.0403574	0.250371	-4.05358
CYCSP4	1.27263	0.0124441	0.133927	-3.07994
AC007601.1	1.27257	0.0432626	0.257369	-4.10967
AC079804.2	1.27245	0.0196417	0.172167	-3.46243
LINC02188	1.27215	0.00171792	0.0472107	-1.37473
TERT	1.27205	0.0173992	0.160791	-3.36135
AC135782.2	1.27179	0.0462007	0.265391	-4.1625
IGBP1P1	1.27175	0.0272454	0.203253	-3.73317
GJA6P	1.27035	0.00968329	0.115893	-2.86764
SLC13A5	1.26957	0.00278931	0.0593702	-1.79746
AL357054.1	1.26932	0.018605	0.167279	-3.41727
SDR16C5	1.26884	0.00217697	0.0524445	-1.58163
AC099811.6	1.26811	0.0473018	0.268586	-4.18139
BBOX1-AS1	1.26776	0.0168796	0.158108	-3.33601
MIR4674	1.2676	0.00516991	0.0834807	-2.33117
AL135844.1	1.26582	0.0315684	0.219166	-3.85392
AC009237.5	1.26572	0.039456	0.247669	-4.03532
TLX2	1.26547	0.00208648	0.0514793	-1.54458
MTND4P26	1.26492	0.0258129	0.197363	-3.68871
CXorf65	1.26438	0.000383268	0.0218656	-0.0513166
FANCD2OS	1.26356	0.0305237	0.215582	-3.82639
AP000484.1	1.26324	0.0175656	0.161943	-3.3693
TAC3	1.26256	0.00652704	0.0944596	-2.53126
AL356417.2	1.26242	0.000585237	0.027037	-0.426698
ZFPM2-AS1	1.26228	9.46e-05	0.0103358	1.19766
AC009927.1	1.26208	0.023252	0.187139	-3.60244
GPRC5A	1.261	0.000310689	0.0195637	0.135354
AC011742.3	1.26083	0.0463638	0.265862	-4.16533
PACERR	1.26053	0.00221259	0.0530205	-1.59579
AC090826.1	1.26044	0.00672829	0.0958359	-2.55726
TRAV28	1.25813	0.041751	0.255516	-4.081
AC083900.1	1.25716	0.0272019	0.203153	-3.73186
AC138951.1	1.2569	0.0374489	0.24125	-3.99302
AP002414.1	1.2562	0.0178075	0.163317	-3.38072
IHH	1.25562	0.00066077	0.0287008	-0.53409
AC018629.1	1.25532	0.00600552	0.0906275	-2.45988
Z98257.1	1.25471	0.00494928	0.081814	-2.29363
TRBV30	1.25445	0.0102075	0.119823	-2.91237
ANKFN1	1.25422	5.68e-05	0.00777501	1.65587
AC015712.7	1.25323	0.0197567	0.172578	-3.46729
MTND4LP14	1.25323	0.0437331	0.257659	-4.11838
FAM3D	1.25323	0.000974497	0.0355518	-0.876962
AC011379.1	1.25314	0.000589611	0.0271444	-0.43329
AC096751.1	1.25252	0.0154484	0.150392	-3.26182
RLIMP1	1.24994	0.0489379	0.273995	-4.20863
AK3P5	1.24974	0.0459148	0.264325	-4.15752
AC022101.1	1.24961	0.0461974	0.265391	-4.16244
AL512638.1	1.24934	0.0452062	0.262264	-4.14502
AC034229.1	1.24894	0.0329439	0.224707	-3.88875
AL512328.1	1.24889	0.0248812	0.19297	-3.65839
BUD13P1	1.24883	0.0140926	0.143475	-3.1847
EML4-AS1	1.24835	0.0230815	0.186851	-3.59635
HTR3E	1.24817	0.0303207	0.214872	-3.82093
TAF9BP2	1.2481	0.0181594	0.165268	-3.39705
MTCO3P15	1.24755	0.0227347	0.185821	-3.58382
AC005324.5	1.24712	0.0347804	0.231073	-3.93295
RP11-206L10.1	1.24652	0.0291046	0.210248	-3.78738
CYP27C1	1.24637	0.000780058	0.0315194	-0.680718
AC099670.2	1.24592	0.0341312	0.229089	-3.91761
RNA5SP457	1.24544	0.0201879	0.174761	-3.48525
NXPE1	1.24419	0.0468684	0.267256	-4.17401
LINC02809	1.24419	0.027285	0.203338	-3.73437
COMP	1.24394	0.00141963	0.042377	-1.20765
C19orf33	1.24363	4.9e-05	0.00714228	1.78935
AC073410.1	1.24292	8.84e-05	0.0100148	1.25832
H3P45	1.24272	0.0338229	0.227866	-3.91022
AL110115.2	1.2425	0.038674	0.245341	-4.01911
AP003040.1	1.24219	0.0235283	0.187869	-3.61221
PPP1R14D	1.24124	4.85e-06	0.00201209	3.88119
CU639417.5	1.24122	0.0354131	0.233438	-3.94762
AC114494.1	1.24058	0.000231627	0.016565	0.396969
AC091826.2	1.24037	0.00921039	0.112821	-2.82511
MUC4	1.24024	0.000568919	0.026783	-0.401663
CREB3L3	1.23869	0.024128	0.189941	-3.63301
AC063950.1	1.23744	0.0427323	0.257369	-4.09973
LINC01269	1.23737	0.00268636	0.058112	-1.76476
RNU6-1331P	1.23704	0.00190255	0.0492884	-1.46399
RNA5SP101	1.23598	0.0114207	0.127655	-3.00746
TNFRSF13B	1.23583	0.0290878	0.210155	-3.78691
ADGRD2	1.2358	0.0278291	0.20532	-3.7506
[truncated: 1,469 more rows]
